# Supplementary material
Source: publisher figshare collection journal article supplement (https://frontiersin.figshare.com/ndownloader/files/25612526)
Supplement: Supplementary file 1 [file 25612526]

Date	Open	High	Low	Close	Adj Close	Volume
1999-06-28	4410.350098	4465.229980	4406.950195	4465.229980	4465.229980	0
1999-06-29	4479.390137	4503.830078	4474.459961	4503.830078	4503.830078	0
1999-06-30	4512.520020	4551.700195	4511.040039	4536.609863	4536.609863	0
1999-07-01	4608.580078	4637.680176	4574.959961	4609.259766	4609.259766	0
1999-07-02	4586.129883	4627.029785	4583.560059	4620.669922	4620.669922	0
1999-07-05	4655.459961	4702.620117	4621.740234	4697.839844	4697.839844	0
1999-07-06	4643.479980	4693.930176	4611.270020	4692.509766	4692.509766	0
1999-07-07	4665.919922	4691.720215	4638.810059	4662.200195	4662.200195	0
1999-07-08	4671.069824	4678.979980	4609.740234	4631.129883	4631.129883	0
1999-07-09	4615.839844	4679.509766	4613.779785	4647.830078	4647.830078	0
1999-07-12	4653.959961	4691.490234	4635.149902	4662.279785	4662.279785	0
1999-07-13	4653.359863	4655.580078	4578.750000	4594.649902	4594.649902	0
1999-07-14	4653.359863	4655.580078	4578.750000	4594.649902	4594.649902	0
1999-07-15	4610.660156	4677.569824	4590.209961	4665.669922	4665.669922	0
1999-07-16	4657.279785	4677.160156	4645.299805	4656.790039	4656.790039	0
1999-07-19	4654.450195	4675.850098	4600.560059	4618.750000	4618.750000	0
1999-07-20	4603.850098	4624.959961	4544.189941	4548.310059	4548.310059	0
1999-07-21	4501.979980	4513.890137	4481.310059	4501.270020	4501.270020	0
1999-07-22	4497.450195	4506.339844	4443.709961	4489.569824	4489.569824	0
1999-07-23	4464.669922	4488.490234	4433.669922	4440.450195	4440.450195	0
1999-07-26	4457.890137	4457.890137	4360.770020	4395.910156	4395.910156	0
1999-07-27	4415.580078	4433.930176	4399.540039	4426.120117	4426.120117	0
1999-07-28	4442.879883	4446.430176	4406.470215	4428.709961	4428.709961	0
1999-07-29	4410.589844	4419.140137	4291.939941	4306.399902	4306.399902	0
1999-07-30	4333.660156	4382.060059	4307.720215	4382.060059	4382.060059	0
1999-08-02	4321.180176	4386.759766	4273.990234	4377.870117	4377.870117	0
1999-08-03	4352.729980	4373.310059	4320.500000	4354.750000	4354.750000	0
1999-08-04	4355.100098	4362.229980	4293.649902	4326.200195	4326.200195	0
1999-08-05	4277.680176	4291.540039	4221.000000	4240.700195	4240.700195	0
1999-08-06	4266.549805	4276.450195	4197.379883	4223.640137	4223.640137	0
1999-08-09	4233.439941	4299.069824	4218.399902	4292.899902	4292.899902	0
1999-08-10	4277.959961	4288.020020	4235.830078	4245.350098	4245.350098	0
1999-08-11	4268.950195	4292.890137	4257.140137	4268.950195	4268.950195	0
1999-08-12	4338.899902	4369.870117	4322.930176	4365.660156	4365.660156	0
1999-08-13	4352.319824	4442.319824	4338.370117	4434.279785	4434.279785	0
1999-08-16	4458.319824	4459.109863	4413.770020	4458.750000	4458.750000	0
1999-08-17	4464.459961	4504.500000	4426.500000	4479.750000	4479.750000	0
1999-08-18	4502.339844	4502.620117	4458.729980	4479.259766	4479.259766	0
1999-08-19	4461.609863	4461.799805	4399.830078	4408.899902	4408.899902	0
1999-08-20	4411.500000	4473.080078	4411.500000	4472.000000	4472.000000	0
1999-08-23	4469.370117	4522.169922	4468.129883	4487.350098	4487.350098	0
1999-08-24	4527.919922	4543.129883	4485.810059	4540.399902	4540.399902	0
1999-08-25	4556.109863	4635.799805	4555.870117	4629.229980	4629.229980	0
1999-08-26	4651.009766	4651.009766	4602.890137	4629.370117	4629.370117	0
1999-08-27	4604.660156	4662.879883	4598.160156	4642.709961	4642.709961	0
1999-08-30	4664.169922	4671.279785	4605.450195	4657.439941	4657.439941	0
1999-08-31	4605.580078	4630.250000	4579.450195	4589.220215	4589.220215	0
1999-09-01	4606.799805	4634.029785	4599.189941	4633.379883	4633.379883	0
1999-09-02	4614.759766	4617.310059	4535.560059	4550.600098	4550.600098	0
1999-09-03	4571.640137	4672.370117	4566.120117	4672.370117	4672.370117	0
1999-09-06	4681.589844	4708.029785	4668.040039	4668.040039	4668.040039	0
1999-09-07	4663.589844	4728.609863	4663.589844	4679.930176	4679.930176	0
1999-09-08	4672.080078	4693.069824	4639.600098	4680.609863	4680.609863	0
1999-09-09	4680.779785	4720.040039	4669.810059	4717.419922	4717.419922	0
1999-09-10	4715.850098	4773.819824	4715.330078	4745.479980	4745.479980	0
1999-09-13	4748.500000	4764.180176	4692.390137	4716.779785	4716.779785	0
1999-09-14	4734.359863	4758.859863	4680.399902	4697.390137	4697.390137	0
1999-09-15	4666.569824	4725.290039	4642.370117	4662.020020	4662.020020	0
1999-09-16	4625.740234	4673.750000	4622.890137	4640.549805	4640.549805	0
1999-09-17	4670.359863	4680.259766	4638.339844	4644.319824	4644.319824	0
1999-09-20	4664.709961	4707.009766	4653.310059	4680.490234	4680.490234	0
1999-09-21	4688.970215	4695.259766	4600.029785	4612.930176	4612.930176	0
1999-09-22	4553.759766	4594.560059	4543.859863	4568.120117	4568.120117	0
1999-09-23	4575.680176	4610.589844	4560.009766	4601.240234	4601.240234	0
1999-09-24	4538.779785	4571.910156	4531.660156	4540.870117	4540.870117	0
1999-09-27	4568.270020	4604.799805	4562.810059	4596.600098	4596.600098	0
1999-09-28	4597.060059	4599.560059	4543.919922	4543.919922	4543.919922	0
1999-09-29	4588.229980	4591.649902	4499.870117	4535.080078	4535.080078	0
1999-09-30	4522.279785	4591.419922	4513.500000	4591.419922	4591.419922	0
1999-10-01	4588.799805	4600.720215	4520.459961	4550.569824	4550.569824	0
1999-10-04	4565.350098	4610.529785	4541.810059	4603.240234	4603.240234	0
1999-10-05	4626.419922	4664.149902	4612.729980	4661.129883	4661.129883	0
1999-10-06	4645.520020	4696.709961	4640.770020	4691.720215	4691.720215	0
1999-10-07	4723.970215	4747.919922	4672.279785	4742.259766	4742.259766	0
1999-10-08	4734.799805	4745.609863	4691.180176	4721.930176	4721.930176	0
1999-10-11	4713.600098	4732.410156	4702.200195	4722.350098	4722.350098	0
1999-10-12	4718.479980	4727.629883	4649.060059	4658.540039	4658.540039	0
1999-10-13	4609.060059	4636.709961	4594.589844	4602.850098	4602.850098	0
1999-10-14	4579.770020	4628.259766	4568.549805	4583.629883	4583.629883	0
1999-10-15	4555.720215	4582.229980	4487.109863	4524.419922	4524.419922	0
1999-10-18	4505.330078	4511.740234	4452.930176	4495.299805	4495.299805	0
1999-10-19	4524.620117	4593.520020	4478.689941	4591.200195	4591.200195	0
1999-10-20	4581.160156	4623.600098	4562.859863	4577.830078	4577.830078	0
1999-10-21	4595.379883	4619.560059	4558.720215	4602.390137	4602.390137	0
1999-10-22	4606.979980	4683.919922	4606.979980	4677.799805	4677.799805	0
1999-10-25	4674.529785	4738.830078	4658.580078	4669.279785	4669.279785	0
1999-10-26	4666.209961	4715.149902	4653.620117	4706.589844	4706.589844	0
1999-10-27	4679.200195	4708.950195	4655.930176	4695.049805	4695.049805	0
1999-10-28	4716.439941	4792.029785	4685.430176	4748.620117	4748.620117	0
1999-10-29	4809.950195	4903.430176	4803.750000	4888.620117	4888.620117	0
1999-11-01	null	null	null	null	null	null
1999-11-02	4872.879883	4898.970215	4831.819824	4898.520020	4898.520020	0
1999-11-03	4875.669922	4926.310059	4866.529785	4917.839844	4917.839844	0
1999-11-04	4915.589844	4975.109863	4900.609863	4943.740234	4943.740234	0
1999-11-05	4944.529785	4986.459961	4916.629883	4975.899902	4975.899902	0
1999-11-08	4953.009766	4994.770020	4946.189941	4994.770020	4994.770020	0
1999-11-09	5014.459961	5057.609863	4996.580078	4997.560059	4997.560059	0
1999-11-10	4997.790039	5051.830078	4972.229980	5051.830078	5051.830078	0
1999-11-11	5066.020020	5132.080078	5060.479980	5132.080078	5132.080078	0
1999-11-12	5127.359863	5170.680176	5105.899902	5141.509766	5141.509766	0
1999-11-15	5152.939941	5199.109863	5129.060059	5178.129883	5178.129883	0
1999-11-16	5166.720215	5191.479980	5148.120117	5191.009766	5191.009766	0
1999-11-17	5190.290039	5194.830078	5145.129883	5178.229980	5178.229980	0
1999-11-18	5154.470215	5254.910156	5154.470215	5246.330078	5246.330078	0
1999-11-19	5254.970215	5272.089844	5211.919922	5263.229980	5263.229980	0
1999-11-22	5267.009766	5304.120117	5144.439941	5147.959961	5147.959961	0
1999-11-23	5168.109863	5196.109863	5139.509766	5152.870117	5152.870117	0
1999-11-24	5165.370117	5217.359863	5142.600098	5189.379883	5189.379883	0
1999-11-25	5211.450195	5370.089844	5198.979980	5352.600098	5352.600098	0
1999-11-26	5388.520020	5437.620117	5340.910156	5396.990234	5396.990234	0
1999-11-29	5374.459961	5443.229980	5364.580078	5373.910156	5373.910156	0
1999-11-30	5368.180176	5387.160156	5291.589844	5341.620117	5341.620117	0
1999-12-01	5315.750000	5382.129883	5312.890137	5381.410156	5381.410156	0
1999-12-02	5377.569824	5379.120117	5329.899902	5354.189941	5354.189941	0
1999-12-03	5360.330078	5471.640137	5360.330078	5468.049805	5468.049805	0
1999-12-06	5462.490234	5513.379883	5445.220215	5509.970215	5509.970215	0
1999-12-07	5507.729980	5559.169922	5499.729980	5534.509766	5534.509766	0
1999-12-08	5501.490234	5520.779785	5472.319824	5487.120117	5487.120117	0
1999-12-09	5476.000000	5558.049805	5461.229980	5548.620117	5548.620117	0
1999-12-10	5478.149902	5553.439941	5467.029785	5481.100098	5481.100098	0
1999-12-13	5484.560059	5538.520020	5468.930176	5535.759766	5535.759766	0
1999-12-14	5524.910156	5587.669922	5499.680176	5564.470215	5564.470215	0
1999-12-15	5533.359863	5587.890137	5494.270020	5530.129883	5530.129883	0
1999-12-16	5545.850098	5583.689941	5522.959961	5540.160156	5540.160156	0
1999-12-17	5546.950195	5597.620117	5502.399902	5502.399902	5502.399902	0
1999-12-20	5496.709961	5547.479980	5475.640137	5521.109863	5521.109863	0
1999-12-21	5499.759766	5535.870117	5483.649902	5529.240234	5529.240234	0
1999-12-22	5509.310059	5657.370117	5509.310059	5621.290039	5621.290039	0
1999-12-23	5629.089844	5770.470215	5629.089844	5731.350098	5731.350098	0
1999-12-24	5778.979980	5867.870117	5774.509766	5852.500000	5852.500000	0
1999-12-27	5886.750000	5922.189941	5826.629883	5834.470215	5834.470215	0
1999-12-28	5901.410156	5901.410156	5801.180176	5827.080078	5827.080078	0
1999-12-29	5856.100098	5879.819824	5814.799805	5837.750000	5837.750000	0
1999-12-30	5882.629883	5979.540039	5858.290039	5958.319824	5958.319824	0
1999-12-31	null	null	null	null	null	null
2000-01-03	6024.379883	6102.120117	5901.770020	5917.370117	5917.370117	0
2000-01-04	5922.229980	5925.069824	5657.200195	5672.020020	5672.020020	0
2000-01-05	5521.830078	5589.500000	5461.589844	5479.700195	5479.700195	0
2000-01-06	5485.930176	5530.259766	5388.850098	5450.109863	5450.109863	0
2000-01-07	5423.879883	5561.689941	5423.879883	5539.609863	5539.609863	0
2000-01-10	5625.819824	5717.439941	5616.979980	5646.120117	5646.120117	0
2000-01-11	5726.509766	5726.509766	5571.990234	5613.899902	5613.899902	0
2000-01-12	5541.229980	5628.729980	5536.500000	5582.500000	5582.500000	0
2000-01-13	5586.250000	5682.270020	5579.490234	5633.240234	5633.240234	0
2000-01-14	5669.140137	5804.160156	5664.709961	5787.439941	5787.439941	0
2000-01-17	5834.750000	5857.359863	5740.189941	5842.779785	5842.779785	0
2000-01-18	5859.439941	5859.439941	5670.270020	5672.950195	5672.950195	0
2000-01-19	5664.919922	5668.060059	5590.189941	5649.459961	5649.459961	0
2000-01-20	5713.040039	5727.819824	5660.250000	5709.740234	5709.740234	0
2000-01-21	5656.100098	5738.160156	5630.629883	5681.319824	5681.319824	0
2000-01-24	5687.359863	5777.680176	5680.600098	5690.859863	5690.859863	0
2000-01-25	5601.180176	5654.520020	5590.169922	5597.500000	5597.500000	0
2000-01-26	5636.609863	5687.430176	5618.959961	5646.319824	5646.319824	0
2000-01-27	5671.640137	5727.529785	5625.229980	5688.350098	5688.350098	0
2000-01-28	5743.200195	5813.279785	5696.089844	5731.049805	5731.049805	0
2000-01-31	5677.790039	5707.879883	5625.720215	5659.810059	5659.810059	0
2000-02-01	5700.870117	5798.470215	5700.870117	5773.419922	5773.419922	0
2000-02-02	5814.259766	5956.140137	5811.359863	5946.859863	5946.859863	0
2000-02-03	6025.839844	6149.669922	5979.060059	6149.669922	6149.669922	0
2000-02-04	6197.399902	6312.419922	6192.859863	6275.720215	6275.720215	0
2000-02-07	6276.470215	6336.680176	6203.580078	6203.580078	6203.580078	0
2000-02-08	6252.310059	6396.390137	6232.950195	6297.660156	6297.660156	0
2000-02-09	6390.790039	6396.970215	6240.069824	6271.600098	6271.600098	0
2000-02-10	6212.560059	6250.720215	6168.660156	6207.520020	6207.520020	0
2000-02-11	6263.439941	6324.060059	6148.470215	6287.009766	6287.009766	0
2000-02-14	6241.910156	6270.600098	6191.759766	6268.319824	6268.319824	0
2000-02-15	6286.009766	6330.009766	6076.859863	6092.629883	6092.629883	0
2000-02-16	6160.419922	6178.069824	5997.770020	6046.270020	6046.270020	0
2000-02-17	6040.000000	6222.870117	6027.220215	6154.959961	6154.959961	0
2000-02-18	6166.120117	6184.000000	6044.220215	6062.720215	6062.720215	0
2000-02-21	5979.129883	5994.040039	5928.040039	5967.279785	5967.279785	0
2000-02-22	5986.850098	6066.109863	5920.609863	5963.310059	5963.310059	0
2000-02-23	6038.859863	6064.209961	5992.020020	6031.250000	6031.250000	0
2000-02-24	6106.319824	6177.589844	6069.509766	6078.779785	6078.779785	0
2000-02-25	6171.569824	6202.529785	6122.709961	6188.640137	6188.640137	0
2000-02-28	6181.049805	6229.600098	6031.689941	6102.729980	6102.729980	0
2000-02-29	6167.040039	6264.250000	6146.850098	6190.959961	6190.959961	0
2000-03-01	6272.129883	6283.600098	6184.509766	6256.319824	6256.319824	0
2000-03-02	6319.229980	6479.430176	6276.339844	6477.549805	6477.549805	0
2000-03-03	6448.339844	6555.870117	6432.740234	6514.109863	6514.109863	0
2000-03-06	6554.950195	6590.350098	6529.370117	6545.979980	6545.979980	0
2000-03-07	6507.259766	6589.180176	6437.040039	6441.850098	6441.850098	0
2000-03-08	6366.830078	6439.060059	6333.459961	6344.970215	6344.970215	0
2000-03-09	6429.339844	6447.729980	6359.410156	6423.430176	6423.430176	0
2000-03-10	6543.189941	6561.339844	6465.049805	6510.279785	6510.279785	0
2000-03-13	6477.470215	6483.810059	6254.379883	6336.930176	6336.930176	0
2000-03-14	6331.220215	6376.810059	6271.589844	6350.350098	6350.350098	0
2000-03-15	6242.790039	6249.660156	6144.069824	6188.939941	6188.939941	0
2000-03-16	6217.620117	6335.899902	6216.970215	6258.529785	6258.529785	0
2000-03-17	6439.830078	6447.169922	6281.770020	6304.279785	6304.279785	0
2000-03-20	6328.040039	6417.629883	6319.479980	6352.509766	6352.509766	0
2000-03-21	6320.120117	6334.620117	6253.720215	6320.870117	6320.870117	0
2000-03-22	6401.450195	6460.810059	6270.439941	6279.290039	6279.290039	0
2000-03-23	6313.049805	6337.319824	6176.620117	6268.310059	6268.310059	0
2000-03-24	6344.790039	6367.569824	6283.390137	6364.259766	6364.259766	0
2000-03-27	6409.580078	6459.629883	6369.009766	6450.850098	6450.850098	0
2000-03-28	6427.680176	6584.370117	6424.459961	6524.299805	6524.299805	0
2000-03-29	6496.450195	6567.950195	6486.549805	6505.479980	6505.479980	0
2000-03-30	6454.359863	6454.899902	6289.979980	6313.819824	6313.819824	0
2000-03-31	6241.750000	6359.509766	6166.819824	6286.049805	6286.049805	0
2000-04-03	6382.279785	6382.279785	6083.080078	6130.270020	6130.270020	0
2000-04-04	6138.000000	6250.089844	6138.000000	6221.939941	6221.939941	0
2000-04-05	6189.700195	6216.129883	5913.709961	6036.939941	6036.939941	0
2000-04-06	6148.740234	6243.419922	6093.299805	6224.020020	6224.020020	0
2000-04-07	6342.200195	6347.750000	6207.759766	6308.040039	6308.040039	0
2000-04-10	6393.700195	6429.509766	6350.779785	6364.899902	6364.899902	0
2000-04-11	6253.589844	6316.799805	6201.509766	6261.419922	6261.419922	0
2000-04-12	6303.500000	6325.770020	6190.959961	6238.700195	6238.700195	0
2000-04-13	6109.870117	6286.970215	6072.890137	6264.339844	6264.339844	0
2000-04-14	6225.589844	6254.450195	6050.189941	6065.709961	6065.709961	0
2000-04-17	5772.870117	6083.229980	5752.439941	6060.540039	6060.540039	0
2000-04-18	6163.910156	6175.660156	5986.140137	6147.439941	6147.439941	0
2000-04-19	6212.930176	6237.970215	6120.080078	6166.459961	6166.459961	0
2000-04-20	6172.779785	6258.770020	6163.419922	6234.509766	6234.509766	0
2000-04-21	null	null	null	null	null	null
2000-04-24	null	null	null	null	null	null
2000-04-25	6219.410156	6325.040039	6162.089844	6320.290039	6320.290039	0
2000-04-26	6393.770020	6461.520020	6380.819824	6390.870117	6390.870117	0
2000-04-27	6403.189941	6403.189941	6184.709961	6247.859863	6247.859863	0
2000-04-28	6378.149902	6456.620117	6306.129883	6419.720215	6419.720215	0
2000-05-01	null	null	null	null	null	null
2000-05-02	6489.040039	6565.560059	6478.470215	6562.410156	6562.410156	0
2000-05-03	6492.060059	6543.720215	6419.560059	6435.649902	6435.649902	0
2000-05-04	6520.299805	6520.299805	6399.990234	6491.740234	6491.740234	0
2000-05-05	6507.899902	6575.169922	6429.979980	6545.759766	6545.759766	0
2000-05-08	6563.830078	6591.439941	6475.919922	6514.419922	6514.419922	0
2000-05-09	6467.750000	6507.250000	6352.919922	6369.609863	6369.609863	0
2000-05-10	6363.390137	6434.080078	6255.520020	6263.339844	6263.339844	0
2000-05-11	6204.100098	6389.000000	6162.250000	6380.129883	6380.129883	0
2000-05-12	6418.910156	6482.029785	6375.270020	6449.270020	6449.270020	0
2000-05-15	6421.790039	6465.779785	6392.270020	6392.270020	6392.270020	0
2000-05-16	6461.049805	6571.649902	6454.259766	6557.390137	6557.390137	0
2000-05-17	6534.540039	6539.399902	6432.939941	6453.049805	6453.049805	0
2000-05-18	6423.100098	6496.000000	6418.220215	6451.970215	6451.970215	0
2000-05-19	6425.270020	6428.220215	6186.759766	6196.049805	6196.049805	0
2000-05-22	6184.040039	6249.180176	6029.810059	6094.169922	6094.169922	0
2000-05-23	6153.959961	6206.439941	6084.200195	6148.560059	6148.560059	0
2000-05-24	6003.899902	6082.629883	6003.899902	6027.100098	6027.100098	0
2000-05-25	6136.319824	6179.529785	6109.109863	6129.660156	6129.660156	0
2000-05-26	6052.229980	6166.450195	6017.790039	6129.149902	6129.149902	0
2000-05-29	6185.990234	6237.020020	6181.830078	6205.129883	6205.129883	0
2000-05-30	6247.220215	6335.689941	6200.740234	6325.490234	6325.490234	0
2000-05-31	6380.209961	6443.680176	6337.310059	6426.259766	6426.259766	0
2000-06-01	6428.459961	6603.240234	6427.350098	6599.709961	6599.709961	0
2000-06-02	6565.350098	6780.660156	6556.149902	6673.520020	6673.520020	0
2000-06-05	6678.770020	6684.080078	6595.080078	6656.259766	6656.259766	0
2000-06-06	6612.569824	6697.310059	6571.580078	6589.770020	6589.770020	0
2000-06-07	6551.569824	6561.609863	6456.560059	6498.500000	6498.500000	0
2000-06-08	6533.669922	6602.950195	6462.399902	6523.660156	6523.660156	0
2000-06-09	6523.459961	6589.850098	6505.580078	6549.049805	6549.049805	0
2000-06-12	null	null	null	null	null	null
2000-06-13	6510.819824	6596.669922	6466.040039	6532.839844	6532.839844	0
2000-06-14	6570.950195	6629.890137	6499.509766	6608.100098	6608.100098	0
2000-06-15	6597.729980	6622.229980	6506.109863	6512.979980	6512.979980	0
2000-06-16	6644.169922	6644.169922	6456.259766	6456.259766	6456.259766	0
2000-06-19	6436.470215	6522.009766	6436.200195	6505.160156	6505.160156	0
2000-06-20	6569.520020	6591.629883	6535.680176	6554.919922	6554.919922	0
2000-06-21	6537.410156	6573.490234	6460.859863	6490.759766	6490.759766	0
2000-06-22	6513.620117	6549.200195	6457.930176	6474.879883	6474.879883	0
2000-06-23	6438.950195	6549.120117	6417.890137	6545.350098	6545.350098	0
2000-06-26	6548.669922	6611.330078	6524.979980	6586.259766	6586.259766	0
2000-06-27	6630.580078	6634.609863	6515.729980	6568.089844	6568.089844	0
2000-06-28	6551.339844	6613.040039	6510.180176	6607.959961	6607.959961	0
2000-06-29	6618.080078	6631.020020	6400.819824	6400.819824	6400.819824	0
2000-06-30	6430.259766	6496.500000	6391.640137	6446.540039	6446.540039	0
2000-07-03	6462.029785	6508.470215	6413.629883	6508.470215	6508.470215	0
2000-07-04	6501.419922	6504.149902	6459.290039	6494.770020	6494.770020	0
2000-07-05	6502.979980	6572.660156	6430.589844	6462.700195	6462.700195	0
2000-07-06	6434.209961	6465.770020	6393.120117	6453.970215	6453.970215	0
2000-07-07	6471.979980	6568.149902	6445.709961	6565.970215	6565.970215	0
2000-07-10	6471.899902	6587.850098	6471.899902	6487.419922	6487.419922	0
2000-07-11	6518.220215	6518.220215	6422.720215	6490.350098	6490.350098	0
2000-07-12	6506.120117	6556.410156	6489.810059	6536.509766	6536.509766	0
2000-07-13	6547.220215	6588.109863	6491.540039	6570.359863	6570.359863	0
2000-07-14	null	null	null	null	null	null
2000-07-17	6605.319824	6631.479980	6582.680176	6619.250000	6619.250000	0
2000-07-18	6625.020020	6625.020020	6514.540039	6514.540039	6514.540039	0
2000-07-19	6542.799805	6558.080078	6485.779785	6495.109863	6495.109863	0
2000-07-20	6498.770020	6567.029785	6484.290039	6563.770020	6563.770020	0
2000-07-21	6544.709961	6577.779785	6450.799805	6464.120117	6464.120117	0
2000-07-24	6474.319824	6539.979980	6444.299805	6502.569824	6502.569824	0
2000-07-25	6576.609863	6576.609863	6458.729980	6463.910156	6463.910156	0
2000-07-26	6539.740234	6539.740234	6466.549805	6493.000000	6493.000000	0
2000-07-27	6512.529785	6582.479980	6464.939941	6511.529785	6511.529785	0
2000-07-28	6507.649902	6535.689941	6396.129883	6415.720215	6415.720215	0
2000-07-31	6412.520020	6542.490234	6374.520020	6542.490234	6542.490234	0
2000-08-01	6524.669922	6569.220215	6508.129883	6532.290039	6532.290039	0
2000-08-02	6539.399902	6573.220215	6473.759766	6529.910156	6529.910156	0
2000-08-03	6465.009766	6486.600098	6354.930176	6354.930176	6354.930176	0
2000-08-04	6424.100098	6479.029785	6391.459961	6461.350098	6461.350098	0
2000-08-07	6462.220215	6536.950195	6447.950195	6519.040039	6519.040039	0
2000-08-08	6519.040039	6573.279785	6492.009766	6532.439941	6532.439941	0
2000-08-09	6555.029785	6619.240234	6553.729980	6570.180176	6570.180176	0
2000-08-10	6565.319824	6611.140137	6539.970215	6562.540039	6562.540039	0
2000-08-11	6570.419922	6580.759766	6513.770020	6553.000000	6553.000000	0
2000-08-14	6613.370117	6625.689941	6554.790039	6609.359863	6609.359863	0
2000-08-15	6645.669922	6676.660156	6604.680176	6636.609863	6636.609863	0
2000-08-16	6666.899902	6710.589844	6646.410156	6684.080078	6684.080078	0
2000-08-17	6712.290039	6712.299805	6601.129883	6635.339844	6635.339844	0
2000-08-18	6640.459961	6649.669922	6587.899902	6594.350098	6594.350098	0
2000-08-21	6559.520020	6615.339844	6529.580078	6571.629883	6571.629883	0
2000-08-22	6599.089844	6605.390137	6513.709961	6513.709961	6513.709961	0
2000-08-23	6539.509766	6552.560059	6449.649902	6501.700195	6501.700195	0
2000-08-24	6513.379883	6523.149902	6454.529785	6461.930176	6461.930176	0
2000-08-25	6485.049805	6602.290039	6485.049805	6595.109863	6595.109863	0
2000-08-28	6598.819824	6639.459961	6570.660156	6615.020020	6615.020020	0
2000-08-29	6608.879883	6642.870117	6561.700195	6633.990234	6633.990234	0
2000-08-30	6627.279785	6698.040039	6588.379883	6634.620117	6634.620117	0
2000-08-31	6636.240234	6668.629883	6562.430176	6625.419922	6625.419922	0
2000-09-01	6648.640137	6843.859863	6648.640137	6813.660156	6813.660156	0
2000-09-04	6823.169922	6944.770020	6822.709961	6922.330078	6922.330078	0
2000-09-05	6929.049805	6929.049805	6838.700195	6856.759766	6856.759766	0
2000-09-06	6836.279785	6873.359863	6795.029785	6796.790039	6796.790039	0
2000-09-07	6780.720215	6848.250000	6769.279785	6834.459961	6834.459961	0
2000-09-08	6814.040039	6845.479980	6693.040039	6703.359863	6703.359863	0
2000-09-11	6722.930176	6735.580078	6650.729980	6675.009766	6675.009766	0
2000-09-12	6638.839844	6714.120117	6621.020020	6697.799805	6697.799805	0
2000-09-13	6696.540039	6728.689941	6564.600098	6568.890137	6568.890137	0
2000-09-14	6605.729980	6683.439941	6591.040039	6637.910156	6637.910156	0
2000-09-15	6620.500000	6632.580078	6570.490234	6614.649902	6614.649902	0
2000-09-18	6562.140137	6584.169922	6470.910156	6522.379883	6522.379883	0
2000-09-19	6482.759766	6535.390137	6468.339844	6529.950195	6529.950195	0
2000-09-20	6570.310059	6570.310059	6396.180176	6405.430176	6405.430176	0
2000-09-21	6414.319824	6447.399902	6215.890137	6254.770020	6254.770020	0
2000-09-22	6110.609863	6259.560059	6085.399902	6258.580078	6258.580078	0
2000-09-25	6344.180176	6346.609863	6276.270020	6336.279785	6336.279785	0
2000-09-26	6296.919922	6349.120117	6276.930176	6294.060059	6294.060059	0
2000-09-27	6258.910156	6372.140137	6233.979980	6319.790039	6319.790039	0
2000-09-28	6358.620117	6371.240234	6253.870117	6311.029785	6311.029785	0
2000-09-29	6290.509766	6367.250000	6249.290039	6266.629883	6266.629883	0
2000-10-02	6150.490234	6384.240234	6150.490234	6349.240234	6349.240234	0
2000-10-03	6315.390137	6434.500000	6304.700195	6400.430176	6400.430176	0
2000-10-04	6366.560059	6389.209961	6284.609863	6296.129883	6296.129883	0
2000-10-05	6317.890137	6369.830078	6304.810059	6335.120117	6335.120117	0
2000-10-06	6323.279785	6356.390137	6229.250000	6258.410156	6258.410156	0
2000-10-09	6220.080078	6227.629883	6082.790039	6110.060059	6110.060059	0
2000-10-10	6166.709961	6184.689941	6114.750000	6143.299805	6143.299805	0
2000-10-11	6062.569824	6096.220215	5947.640137	5956.120117	5956.120117	0
2000-10-12	6025.009766	6076.660156	5848.419922	5990.700195	5990.700195	0
2000-10-13	5862.509766	6064.209961	5828.140137	6064.209961	6064.209961	0
2000-10-16	6158.339844	6158.339844	6044.040039	6088.040039	6088.040039	0
2000-10-17	6097.189941	6151.649902	6067.149902	6067.149902	6067.149902	0
2000-10-18	5998.359863	6012.430176	5833.629883	5937.350098	5937.350098	0
2000-10-19	6012.560059	6071.220215	5964.770020	6066.479980	6066.479980	0
2000-10-20	6108.589844	6183.459961	6051.509766	6149.439941	6149.439941	0
2000-10-23	6123.189941	6203.509766	6120.089844	6182.339844	6182.339844	0
2000-10-24	6194.060059	6323.740234	6150.850098	6323.740234	6323.740234	0
2000-10-25	6246.140137	6301.259766	6188.390137	6277.899902	6277.899902	0
2000-10-26	6199.939941	6297.189941	6186.319824	6208.419922	6208.419922	0
2000-10-27	6274.790039	6319.740234	6225.910156	6268.930176	6268.930176	0
2000-10-30	6232.000000	6296.839844	6230.910156	6296.839844	6296.839844	0
2000-10-31	6347.049805	6400.129883	6320.759766	6397.660156	6397.660156	0
2000-11-01	6434.899902	6434.899902	6346.750000	6409.049805	6409.049805	0
2000-11-02	6419.470215	6441.290039	6383.069824	6400.310059	6400.310059	0
2000-11-03	6428.220215	6444.979980	6371.759766	6398.919922	6398.919922	0
2000-11-06	6459.500000	6459.500000	6348.560059	6352.240234	6352.240234	0
2000-11-07	6393.620117	6395.490234	6329.910156	6386.069824	6386.069824	0
2000-11-08	6423.600098	6452.970215	6332.399902	6336.029785	6336.029785	0
2000-11-09	6292.270020	6330.600098	6236.819824	6271.149902	6271.149902	0
2000-11-10	6261.700195	6305.669922	6137.589844	6147.490234	6147.490234	0
2000-11-13	6104.990234	6132.640137	5996.720215	6037.729980	6037.729980	0
2000-11-14	6081.959961	6240.330078	6072.529785	6225.979980	6225.979980	0
2000-11-15	6223.000000	6312.779785	6197.049805	6301.779785	6301.779785	0
2000-11-16	6290.370117	6290.680176	6220.620117	6283.060059	6283.060059	0
2000-11-17	6221.790039	6272.899902	6161.919922	6161.919922	6161.919922	0
2000-11-20	6178.569824	6195.410156	6005.899902	6021.790039	6021.790039	0
2000-11-21	6021.290039	6116.819824	6013.290039	6081.020020	6081.020020	0
2000-11-22	6043.140137	6049.600098	5937.370117	5944.700195	5944.700195	0
2000-11-23	5949.759766	6055.209961	5933.080078	6053.040039	6053.040039	0
2000-11-24	6047.529785	6162.879883	5989.129883	6145.649902	6145.649902	0
2000-11-27	6198.669922	6254.169922	6167.450195	6171.330078	6171.330078	0
2000-11-28	6145.189941	6172.770020	6055.040039	6069.220215	6069.220215	0
2000-11-29	6013.379883	6091.580078	5978.959961	6060.649902	6060.649902	0
2000-11-30	5992.640137	6015.859863	5893.540039	5928.080078	5928.080078	0
2000-12-01	5942.359863	6023.109863	5915.330078	5928.500000	5928.500000	0
2000-12-04	5933.310059	5933.310059	5763.180176	5791.509766	5791.509766	0
2000-12-05	5836.830078	5994.890137	5836.830078	5994.890137	5994.890137	0
2000-12-06	6084.529785	6108.540039	5967.220215	5985.240234	5985.240234	0
2000-12-07	5917.319824	6020.700195	5900.859863	5984.689941	5984.689941	0
2000-12-08	6003.140137	6102.580078	5937.129883	5939.319824	5939.319824	0
2000-12-11	6005.620117	6090.089844	6005.620117	6077.879883	6077.879883	0
2000-12-12	6071.750000	6103.759766	6026.720215	6047.660156	6047.660156	0
2000-12-13	6096.609863	6126.410156	5942.479980	5962.290039	5962.290039	0
2000-12-14	5919.129883	5938.799805	5845.899902	5905.649902	5905.649902	0
2000-12-15	5854.680176	5884.600098	5818.569824	5839.540039	5839.540039	0
2000-12-18	5832.700195	5937.870117	5832.700195	5887.490234	5887.490234	0
2000-12-19	5848.790039	5972.419922	5848.790039	5958.859863	5958.859863	0
2000-12-20	5867.609863	5902.080078	5748.870117	5766.299805	5766.299805	0
2000-12-21	5705.000000	5810.270020	5673.870117	5758.919922	5758.919922	0
2000-12-22	5772.680176	5805.209961	5735.430176	5783.729980	5783.729980	0
2000-12-25	null	null	null	null	null	null
2000-12-26	null	null	null	null	null	null
2000-12-27	5769.240234	5874.089844	5769.240234	5857.149902	5857.149902	0
2000-12-28	5880.910156	5924.930176	5877.899902	5920.600098	5920.600098	0
2000-12-29	5931.680176	5981.399902	5895.370117	5926.419922	5926.419922	0
2001-01-01	null	null	null	null	null	null
2001-01-02	5956.149902	5956.149902	5774.640137	5798.899902	5798.899902	0
2001-01-03	5767.649902	5767.649902	5631.319824	5684.049805	5684.049805	0
2001-01-04	5890.330078	5890.330078	5764.879883	5815.990234	5815.990234	0
2001-01-05	5799.180176	5862.040039	5733.479980	5758.020020	5758.020020	0
2001-01-08	5715.799805	5757.500000	5695.189941	5732.799805	5732.799805	0
2001-01-09	5778.779785	5792.560059	5627.859863	5663.189941	5663.189941	0
2001-01-10	5672.040039	5686.240234	5603.919922	5653.350098	5653.350098	0
2001-01-11	5663.029785	5702.930176	5631.890137	5702.779785	5702.779785	0
2001-01-12	5738.669922	5841.819824	5738.500000	5834.339844	5834.339844	0
2001-01-15	5811.330078	5853.879883	5795.879883	5833.379883	5833.379883	0
2001-01-16	5820.390137	5838.410156	5749.069824	5761.669922	5761.669922	0
2001-01-17	5806.910156	5908.040039	5806.910156	5884.089844	5884.089844	0
2001-01-18	5868.140137	5919.379883	5837.509766	5860.160156	5860.160156	0
2001-01-19	5915.970215	5962.799805	5840.009766	5845.729980	5845.729980	0
2001-01-22	5844.970215	5901.250000	5805.620117	5882.759766	5882.759766	0
2001-01-23	5816.529785	5850.830078	5803.799805	5839.729980	5839.729980	0
2001-01-24	5898.390137	5925.129883	5862.729980	5900.319824	5900.319824	0
2001-01-25	5860.540039	5959.810059	5850.939941	5934.680176	5934.680176	0
2001-01-26	5828.220215	5935.200195	5828.220215	5925.620117	5925.620117	0
2001-01-29	5930.200195	5935.479980	5873.770020	5887.899902	5887.899902	0
2001-01-30	5896.259766	5948.060059	5860.220215	5917.149902	5917.149902	0
2001-01-31	5933.259766	5999.180176	5914.270020	5998.490234	5998.490234	0
2001-02-01	5936.310059	5970.299805	5870.509766	5899.720215	5899.720215	0
2001-02-02	5920.890137	5933.879883	5823.799805	5826.370117	5826.370117	0
2001-02-05	5795.729980	5838.959961	5784.779785	5823.490234	5823.490234	0
2001-02-06	5831.970215	5859.350098	5800.700195	5852.350098	5852.350098	0
2001-02-07	5813.100098	5813.100098	5744.680176	5752.140137	5752.140137	0
2001-02-08	5771.229980	5816.129883	5752.740234	5773.459961	5773.459961	0
2001-02-09	5764.680176	5772.790039	5701.640137	5712.359863	5712.359863	0
2001-02-12	5700.310059	5777.879883	5700.310059	5759.479980	5759.479980	0
2001-02-13	5789.580078	5791.240234	5720.450195	5739.029785	5739.029785	0
2001-02-14	5701.729980	5703.890137	5630.740234	5644.229980	5644.229980	0
2001-02-15	5665.040039	5709.270020	5628.950195	5704.529785	5704.529785	0
2001-02-16	5651.490234	5662.189941	5583.080078	5595.129883	5595.129883	0
2001-02-19	5570.569824	5610.310059	5570.569824	5584.750000	5584.750000	0
2001-02-20	5592.720215	5640.419922	5515.500000	5548.740234	5548.740234	0
2001-02-21	5516.850098	5538.790039	5433.299805	5474.370117	5474.370117	0
2001-02-22	5436.990234	5509.879883	5410.339844	5452.479980	5452.479980	0
2001-02-23	5455.779785	5466.490234	5302.790039	5322.839844	5322.839844	0
2001-02-26	5372.979980	5429.790039	5341.919922	5415.100098	5415.100098	0
2001-02-27	5440.049805	5451.089844	5380.049805	5437.759766	5437.759766	0
2001-02-28	5391.439941	5443.729980	5339.779785	5367.479980	5367.479980	0
2001-03-01	5334.229980	5348.350098	5260.020020	5341.339844	5341.339844	0
2001-03-02	5329.049805	5365.790039	5259.939941	5291.919922	5291.919922	0
2001-03-05	5325.029785	5373.000000	5274.830078	5368.830078	5368.830078	0
2001-03-06	5401.250000	5468.660156	5382.990234	5457.279785	5457.279785	0
2001-03-07	5429.160156	5489.779785	5397.990234	5483.680176	5483.680176	0
2001-03-08	5462.979980	5507.259766	5410.779785	5438.660156	5438.660156	0
2001-03-09	5393.879883	5423.410156	5342.089844	5368.890137	5368.890137	0
2001-03-12	5326.109863	5326.109863	5216.859863	5242.399902	5242.399902	0
2001-03-13	5157.500000	5224.169922	5155.160156	5186.870117	5186.870117	0
2001-03-14	5242.680176	5242.680176	4965.470215	5115.500000	5115.500000	0
2001-03-15	5146.740234	5180.220215	5061.370117	5177.660156	5177.660156	0
2001-03-16	5197.740234	5197.740234	5091.169922	5104.770020	5104.770020	0
2001-03-19	5100.080078	5170.879883	5035.419922	5048.600098	5048.600098	0
2001-03-20	5114.720215	5145.879883	5092.589844	5138.399902	5138.399902	0
2001-03-21	5050.970215	5062.680176	4977.279785	5023.759766	5023.759766	0
2001-03-22	4992.299805	5001.080078	4804.399902	4824.819824	4824.819824	0
2001-03-23	4922.390137	4968.520020	4911.540039	4951.129883	4951.129883	0
2001-03-26	5004.250000	5127.140137	4982.609863	5124.799805	5124.799805	0
2001-03-27	5104.459961	5235.600098	5079.620117	5235.600098	5235.600098	0
2001-03-28	5243.200195	5243.200195	5118.779785	5150.430176	5150.430176	0
2001-03-29	5072.479980	5163.120117	5028.729980	5157.919922	5157.919922	0
2001-03-30	5132.490234	5233.680176	5132.089844	5180.450195	5180.450195	0
2001-04-02	5218.479980	5218.479980	5111.819824	5210.479980	5210.479980	0
2001-04-03	5153.140137	5153.140137	4989.729980	5004.000000	5004.000000	0
2001-04-04	4946.209961	5086.209961	4872.919922	5071.819824	5071.819824	0
2001-04-05	5104.240234	5196.720215	5085.160156	5158.560059	5158.560059	0
2001-04-06	5232.089844	5232.950195	5087.490234	5139.709961	5139.709961	0
2001-04-09	5106.660156	5217.279785	5102.410156	5183.220215	5183.220215	0
2001-04-10	5213.770020	5335.720215	5192.140137	5331.229980	5331.229980	0
2001-04-11	5345.549805	5403.870117	5309.649902	5361.529785	5361.529785	0
2001-04-12	5359.669922	5402.720215	5329.600098	5372.709961	5372.709961	0
2001-04-13	null	null	null	null	null	null
2001-04-16	null	null	null	null	null	null
2001-04-17	5271.240234	5362.109863	5216.569824	5340.979980	5340.979980	0
2001-04-18	5429.180176	5533.799805	5416.319824	5505.080078	5505.080078	0
2001-04-19	5530.500000	5531.810059	5436.939941	5480.049805	5480.049805	0
2001-04-20	5483.450195	5530.620117	5431.080078	5449.339844	5449.339844	0
2001-04-23	5424.319824	5432.839844	5370.509766	5396.850098	5396.850098	0
2001-04-24	5399.609863	5488.330078	5391.450195	5424.430176	5424.430176	0
2001-04-25	5407.990234	5425.120117	5374.520020	5407.839844	5407.839844	0
2001-04-26	5418.680176	5491.529785	5374.220215	5481.729980	5481.729980	0
2001-04-27	5461.669922	5607.120117	5444.819824	5575.970215	5575.970215	0
2001-04-30	5580.459961	5653.140137	5570.740234	5640.029785	5640.029785	0
2001-05-01	null	null	null	null	null	null
2001-05-02	5661.080078	5670.020020	5571.490234	5572.910156	5572.910156	0
2001-05-03	5605.620117	5614.209961	5457.069824	5457.069824	5457.069824	0
2001-05-04	5455.240234	5502.709961	5378.359863	5455.549805	5455.549805	0
2001-05-07	5492.080078	5527.040039	5471.390137	5498.520020	5498.520020	0
2001-05-08	5494.379883	5558.520020	5460.759766	5516.930176	5516.930176	0
2001-05-09	5486.750000	5497.089844	5440.740234	5492.080078	5492.080078	0
2001-05-10	5482.029785	5624.509766	5481.209961	5606.459961	5606.459961	0
2001-05-11	5580.729980	5607.580078	5549.500000	5567.250000	5567.250000	0
2001-05-14	5523.330078	5533.970215	5469.870117	5487.720215	5487.720215	0
2001-05-15	5513.640137	5545.330078	5462.060059	5544.129883	5544.129883	0
2001-05-16	5502.979980	5523.640137	5433.310059	5522.689941	5522.689941	0
2001-05-17	5607.319824	5632.540039	5569.660156	5592.649902	5592.649902	0
2001-05-18	5569.879883	5658.259766	5562.430176	5638.240234	5638.240234	0
2001-05-21	5647.350098	5660.689941	5584.720215	5652.040039	5652.040039	0
2001-05-22	5687.709961	5728.520020	5675.540039	5693.470215	5693.470215	0
2001-05-23	5663.870117	5688.640137	5630.740234	5630.740234	5630.740234	0
2001-05-24	5619.009766	5680.259766	5615.120117	5656.470215	5656.470215	0
2001-05-25	5651.060059	5661.339844	5568.229980	5581.939941	5581.939941	0
2001-05-28	5584.540039	5644.410156	5575.919922	5606.319824	5606.319824	0
2001-05-29	5588.740234	5631.390137	5537.509766	5542.270020	5542.270020	0
2001-05-30	5533.700195	5539.459961	5440.060059	5444.270020	5444.270020	0
2001-05-31	5420.740234	5472.759766	5405.660156	5454.189941	5454.189941	0
2001-06-01	5453.290039	5471.410156	5387.759766	5432.709961	5432.709961	0
2001-06-04	null	null	null	null	null	null
2001-06-05	5474.470215	5517.959961	5455.339844	5516.270020	5516.270020	0
2001-06-06	5535.459961	5546.600098	5491.259766	5496.490234	5496.490234	0
2001-06-07	5474.240234	5500.990234	5431.720215	5453.390137	5453.390137	0
2001-06-08	5479.069824	5537.899902	5439.930176	5439.930176	5439.930176	0
2001-06-11	5432.250000	5478.580078	5413.609863	5418.470215	5418.470215	0
2001-06-12	5418.270020	5430.890137	5300.069824	5311.939941	5311.939941	0
2001-06-13	5340.779785	5369.180176	5334.240234	5353.629883	5353.629883	0
2001-06-14	5304.569824	5322.490234	5276.779785	5297.069824	5297.069824	0
2001-06-15	5258.589844	5282.560059	5192.350098	5243.839844	5243.839844	0
2001-06-18	5225.939941	5244.680176	5160.279785	5160.279785	5160.279785	0
2001-06-19	5159.209961	5248.339844	5159.209961	5199.410156	5199.410156	0
2001-06-20	5186.779785	5186.779785	5114.729980	5170.490234	5170.490234	0
2001-06-21	5204.149902	5211.669922	5121.609863	5134.970215	5134.970215	0
2001-06-22	5163.109863	5213.180176	5150.399902	5183.669922	5183.669922	0
2001-06-25	5145.439941	5230.549805	5144.660156	5213.459961	5213.459961	0
2001-06-26	5199.080078	5204.450195	5077.000000	5090.729980	5090.729980	0
2001-06-27	5099.799805	5110.729980	5053.109863	5057.720215	5057.720215	0
2001-06-28	5055.319824	5135.100098	4967.609863	5133.560059	5133.560059	0
2001-06-29	5139.000000	5225.330078	5123.330078	5225.330078	5225.330078	0
2001-07-02	5215.750000	5299.899902	5187.129883	5296.509766	5296.509766	0
2001-07-03	5269.779785	5273.180176	5205.779785	5205.779785	5205.779785	0
2001-07-04	5222.310059	5222.310059	5139.500000	5175.129883	5175.129883	0
2001-07-05	5115.560059	5148.729980	5096.450195	5123.830078	5123.830078	0
2001-07-06	5088.189941	5088.189941	4992.459961	4999.359863	4999.359863	0
2001-07-09	5008.859863	5039.959961	4903.060059	5027.370117	5027.370117	0
2001-07-10	5013.529785	5067.410156	4960.129883	4973.399902	4973.399902	0
2001-07-11	4880.509766	4958.319824	4880.509766	4914.680176	4914.680176	0
2001-07-12	4996.069824	5010.000000	4948.359863	4961.430176	4961.430176	0
2001-07-13	5000.689941	5028.529785	4933.250000	5025.240234	5025.240234	0
2001-07-16	5036.620117	5036.620117	4976.020020	5022.759766	5022.759766	0
2001-07-17	4972.520020	4994.720215	4956.560059	4978.540039	4978.540039	0
2001-07-18	4985.270020	4985.270020	4865.410156	4867.500000	4867.500000	0
2001-07-19	4887.520020	4930.390137	4825.879883	4930.390137	4930.390137	0
2001-07-20	4880.580078	4894.229980	4841.870117	4880.700195	4880.700195	0
2001-07-23	4861.660156	4961.419922	4851.649902	4911.919922	4911.919922	0
2001-07-24	4886.209961	4913.229980	4853.950195	4855.600098	4855.600098	0
2001-07-25	4864.879883	4888.250000	4773.169922	4773.169922	4773.169922	0
2001-07-26	4842.779785	4854.370117	4790.100098	4842.120117	4842.120117	0
2001-07-27	4872.839844	4968.060059	4872.129883	4967.149902	4967.149902	0
2001-07-30	4982.390137	5054.399902	4946.120117	5033.709961	5033.709961	0
2001-07-31	5022.549805	5095.379883	4995.890137	5085.509766	5085.509766	0
2001-08-01	5073.750000	5125.310059	5068.890137	5111.580078	5111.580078	0
2001-08-02	5121.950195	5204.200195	5083.339844	5088.700195	5088.700195	0
2001-08-03	5078.160156	5093.270020	5019.109863	5031.290039	5031.290039	0
2001-08-06	5017.629883	5096.850098	5009.450195	5066.250000	5066.250000	0
2001-08-07	5039.040039	5062.859863	4974.350098	5051.620117	5051.620117	0
2001-08-08	5034.899902	5038.529785	4964.700195	4986.229980	4986.229980	0
2001-08-09	4927.950195	4934.259766	4872.419922	4888.299805	4888.299805	0
2001-08-10	4913.839844	4962.160156	4822.290039	4846.020020	4846.020020	0
2001-08-13	4903.729980	4925.560059	4829.819824	4920.350098	4920.350098	0
2001-08-14	4946.069824	5003.209961	4942.100098	4962.640137	4962.640137	0
2001-08-15	4948.859863	4974.020020	4924.020020	4933.970215	4933.970215	0
2001-08-16	4915.140137	4916.490234	4849.379883	4882.620117	4882.620117	0
2001-08-17	4905.700195	4927.439941	4753.120117	4777.370117	4777.370117	0
2001-08-20	4770.500000	4817.979980	4724.549805	4791.430176	4791.430176	0
2001-08-21	4806.899902	4836.000000	4776.819824	4834.870117	4834.870117	0
2001-08-22	4788.910156	4891.029785	4768.890137	4812.140137	4812.140137	0
2001-08-23	4835.459961	4842.379883	4775.330078	4809.500000	4809.500000	0
2001-08-24	4830.740234	4919.910156	4822.169922	4916.560059	4916.560059	0
2001-08-27	4917.140137	4963.859863	4899.089844	4905.790039	4905.790039	0
2001-08-28	4891.560059	4940.930176	4793.000000	4815.720215	4815.720215	0
2001-08-29	4792.240234	4869.939941	4765.709961	4834.890137	4834.890137	0
2001-08-30	4827.180176	4863.259766	4697.669922	4703.870117	4703.870117	0
2001-08-31	4687.930176	4722.540039	4668.189941	4689.339844	4689.339844	0
2001-09-03	4712.089844	4712.089844	4585.390137	4629.799805	4629.799805	0
2001-09-04	4696.939941	4708.040039	4576.419922	4673.979980	4673.979980	0
2001-09-05	4627.169922	4643.750000	4563.689941	4571.560059	4571.560059	0
2001-09-06	4616.600098	4616.600098	4470.729980	4480.750000	4480.750000	0
2001-09-07	4485.069824	4507.700195	4396.549805	4413.509766	4413.509766	0
2001-09-10	4372.129883	4427.160156	4251.540039	4383.740234	4383.740234	0
2001-09-11	4059.750000	4059.750000	4059.750000	4059.750000	4059.750000	0
2001-09-12	3861.669922	4182.910156	3858.370117	4114.259766	4114.259766	0
2001-09-13	4089.830078	4143.950195	4041.389893	4113.870117	4113.870117	0
2001-09-14	4124.129883	4174.919922	3906.739990	3909.489990	3909.489990	0
2001-09-17	3861.080078	4024.949951	3783.620117	4015.459961	4015.459961	0
2001-09-18	3980.649902	3980.649902	3891.320068	3970.179932	3970.179932	0
2001-09-19	3955.409912	4014.860107	3873.810059	3888.929932	3888.929932	0
2001-09-20	3878.570068	3913.639893	3714.050049	3738.179932	3738.179932	0
2001-09-21	3674.370117	3733.120117	3463.070068	3652.870117	3652.870117	0
2001-09-24	3713.760010	3861.189941	3713.760010	3861.189941	3861.189941	0
2001-09-25	3795.850098	3947.830078	3769.090088	3902.850098	3902.850098	0
2001-09-26	3882.260010	4012.939941	3836.419922	3975.530029	3975.530029	0
2001-09-27	3946.709961	4013.229980	3928.120117	4013.229980	4013.229980	0
2001-09-28	4065.219971	4117.839844	4040.889893	4079.020020	4079.020020	0
2001-10-01	4097.220215	4097.640137	3979.050049	4004.570068	4004.570068	0
2001-10-02	4018.459961	4044.659912	3914.389893	4044.659912	4044.659912	0
2001-10-03	4034.820068	4034.820068	3930.040039	4024.250000	4024.250000	0
2001-10-04	4110.520020	4195.799805	4094.020020	4195.799805	4195.799805	0
2001-10-05	4137.160156	4232.660156	4116.149902	4164.759766	4164.759766	0
2001-10-08	4102.930176	4172.209961	4031.090088	4172.209961	4172.209961	0
2001-10-09	4149.330078	4217.229980	4123.540039	4176.970215	4176.970215	0
2001-10-10	4145.479980	4319.379883	4131.569824	4319.379883	4319.379883	0
2001-10-11	4328.350098	4407.669922	4312.479980	4330.680176	4330.680176	0
2001-10-12	4372.419922	4381.490234	4283.500000	4336.879883	4336.879883	0
2001-10-15	4295.209961	4300.720215	4196.729980	4213.910156	4213.910156	0
2001-10-16	4220.470215	4308.490234	4193.009766	4308.490234	4308.490234	0
2001-10-17	4379.810059	4458.040039	4362.990234	4411.509766	4411.509766	0
2001-10-18	4308.240234	4359.410156	4291.390137	4338.089844	4338.089844	0
2001-10-19	4310.799805	4347.890137	4228.229980	4264.890137	4264.890137	0
2001-10-22	4281.779785	4345.450195	4243.120117	4341.290039	4341.290039	0
2001-10-23	4385.350098	4455.759766	4377.410156	4455.759766	4455.759766	0
2001-10-24	4420.799805	4535.899902	4394.129883	4486.350098	4486.350098	0
2001-10-25	4491.680176	4546.419922	4363.359863	4378.450195	4378.450195	0
2001-10-26	4443.879883	4482.759766	4419.399902	4478.629883	4478.629883	0
2001-10-29	4465.669922	4465.669922	4382.569824	4383.240234	4383.240234	0
2001-10-30	4315.189941	4326.520020	4235.689941	4251.930176	4251.930176	0
2001-10-31	4238.020020	4391.009766	4201.810059	4341.290039	4341.290039	0
2001-11-01	4325.189941	4366.939941	4276.609863	4366.939941	4366.939941	0
2001-11-02	4387.810059	4418.830078	4338.819824	4369.399902	4369.399902	0
2001-11-05	4392.049805	4488.939941	4389.770020	4485.339844	4485.339844	0
2001-11-06	4500.740234	4532.259766	4438.180176	4461.689941	4461.689941	0
2001-11-07	4491.750000	4518.009766	4410.629883	4493.270020	4493.270020	0
2001-11-08	4494.939941	4589.080078	4482.490234	4573.040039	4573.040039	0
2001-11-09	4517.299805	4566.129883	4508.430176	4514.279785	4514.279785	0
2001-11-12	4512.430176	4517.479980	4329.740234	4376.580078	4376.580078	0
2001-11-13	4437.930176	4570.700195	4437.930176	4565.680176	4565.680176	0
2001-11-14	4573.229980	4643.509766	4540.750000	4575.089844	4575.089844	0
2001-11-15	4607.310059	4643.149902	4530.830078	4577.279785	4577.279785	0
2001-11-16	4591.509766	4604.759766	4544.689941	4587.299805	4587.299805	0
2001-11-19	4620.759766	4686.200195	4600.720215	4660.490234	4660.490234	0
2001-11-20	4686.620117	4686.620117	4574.310059	4593.520020	4593.520020	0
2001-11-21	4548.919922	4616.310059	4543.669922	4557.029785	4557.029785	0
2001-11-22	4576.129883	4615.779785	4563.799805	4599.799805	4599.799805	0
2001-11-23	4617.060059	4634.350098	4536.399902	4573.819824	4573.819824	0
2001-11-26	4620.709961	4639.839844	4561.029785	4564.379883	4564.379883	0
2001-11-27	4589.350098	4595.850098	4474.549805	4485.819824	4485.819824	0
2001-11-28	4468.540039	4512.310059	4433.009766	4445.500000	4445.500000	0
2001-11-29	4407.330078	4481.129883	4392.669922	4445.870117	4445.870117	0
2001-11-30	4472.939941	4513.350098	4453.049805	4476.060059	4476.060059	0
2001-12-03	4439.549805	4463.959961	4401.359863	4463.839844	4463.839844	0
2001-12-04	4473.109863	4529.240234	4464.089844	4529.240234	4529.240234	0
2001-12-05	4580.290039	4686.660156	4571.930176	4677.549805	4677.549805	0
2001-12-06	4695.859863	4735.209961	4641.229980	4679.379883	4679.379883	0
2001-12-07	4664.370117	4680.430176	4631.049805	4642.939941	4642.939941	0
2001-12-10	4614.930176	4619.259766	4548.669922	4556.290039	4556.290039	0
2001-12-11	4535.000000	4580.169922	4510.319824	4551.939941	4551.939941	0
2001-12-12	4568.149902	4588.089844	4505.859863	4510.680176	4510.680176	0
2001-12-13	4505.740234	4528.589844	4396.709961	4410.660156	4410.660156	0
2001-12-14	4378.979980	4411.020020	4340.020020	4340.020020	4340.020020	0
2001-12-17	4366.000000	4495.060059	4328.770020	4485.169922	4485.169922	0
2001-12-18	4470.549805	4515.729980	4452.390137	4480.100098	4480.100098	0
2001-12-19	4466.049805	4500.180176	4424.759766	4467.919922	4467.919922	0
2001-12-20	4437.140137	4477.000000	4414.830078	4426.720215	4426.720215	0
2001-12-21	4391.549805	4511.229980	4376.729980	4499.339844	4499.339844	0
2001-12-24	4487.169922	4509.779785	4470.500000	4502.100098	4502.100098	0
2001-12-25	null	null	null	null	null	null
2001-12-26	null	null	null	null	null	null
2001-12-27	4524.060059	4593.520020	4504.979980	4591.160156	4591.160156	0
2001-12-28	4603.810059	4630.189941	4582.290039	4624.580078	4624.580078	0
2001-12-31	null	null	null	null	null	null
2002-01-01	null	null	null	null	null	null
2002-01-02	4617.950195	4640.850098	4567.919922	4580.439941	4580.439941	0
2002-01-03	4626.759766	4692.240234	4609.279785	4681.200195	4681.200195	0
2002-01-04	4702.700195	4720.040039	4663.399902	4682.790039	4682.790039	0
2002-01-07	4673.450195	4706.580078	4611.129883	4615.540039	4615.540039	0
2002-01-08	4594.259766	4631.919922	4560.339844	4568.089844	4568.089844	0
2002-01-09	4578.680176	4592.689941	4525.529785	4587.009766	4587.009766	0
2002-01-10	4551.870117	4573.029785	4503.609863	4515.520020	4515.520020	0
2002-01-11	4532.740234	4583.810059	4516.279785	4554.689941	4554.689941	0
2002-01-14	4526.419922	4530.669922	4448.470215	4453.970215	4453.970215	0
2002-01-15	4437.790039	4519.240234	4419.140137	4518.419922	4518.419922	0
2002-01-16	4482.009766	4484.009766	4421.879883	4425.500000	4425.500000	0
2002-01-17	4431.720215	4489.259766	4431.720215	4475.640137	4475.640137	0
2002-01-18	4440.589844	4466.669922	4429.509766	4448.850098	4448.850098	0
2002-01-21	4438.390137	4440.299805	4386.390137	4423.799805	4423.799805	0
2002-01-22	4424.589844	4493.180176	4407.850098	4446.720215	4446.720215	0
2002-01-23	4409.209961	4452.600098	4402.490234	4450.810059	4450.810059	0
2002-01-24	4483.069824	4527.279785	4470.689941	4508.069824	4508.069824	0
2002-01-25	4511.600098	4511.600098	4446.149902	4484.310059	4484.310059	0
2002-01-28	4498.770020	4557.609863	4496.520020	4533.129883	4533.129883	0
2002-01-29	4540.259766	4563.379883	4476.100098	4476.100098	4476.100098	0
2002-01-30	4426.240234	4442.819824	4385.569824	4407.270020	4407.270020	0
2002-01-31	4463.640137	4482.990234	4437.790039	4461.870117	4461.870117	0
2002-02-01	4483.899902	4499.680176	4446.810059	4455.560059	4455.560059	0
2002-02-04	4459.520020	4459.520020	4384.629883	4397.540039	4397.540039	0
2002-02-05	4345.609863	4369.830078	4276.859863	4307.750000	4307.750000	0
2002-02-06	4307.220215	4331.870117	4250.029785	4273.810059	4273.810059	0
2002-02-07	4253.680176	4309.649902	4228.379883	4295.649902	4295.649902	0
2002-02-08	4272.939941	4319.970215	4262.359863	4299.040039	4299.040039	0
2002-02-11	4341.189941	4367.520020	4329.569824	4353.209961	4353.209961	0
2002-02-12	4375.120117	4399.229980	4319.569824	4337.950195	4337.950195	0
2002-02-13	4339.799805	4375.620117	4306.740234	4364.450195	4364.450195	0
2002-02-14	4388.080078	4434.930176	4364.250000	4429.310059	4429.310059	0
2002-02-15	4398.220215	4425.919922	4376.259766	4377.000000	4377.000000	0
2002-02-18	4351.779785	4376.759766	4346.509766	4347.049805	4347.049805	0
2002-02-19	4323.810059	4323.810059	4255.870117	4256.359863	4256.359863	0
2002-02-20	4248.759766	4279.080078	4210.299805	4238.990234	4238.990234	0
2002-02-21	4298.450195	4316.700195	4264.629883	4287.220215	4287.220215	0
2002-02-22	4251.830078	4264.540039	4224.459961	4245.200195	4245.200195	0
2002-02-25	4270.549805	4305.439941	4240.259766	4305.439941	4305.439941	0
2002-02-26	4340.450195	4385.930176	4330.580078	4340.859863	4340.859863	0
2002-02-27	4363.640137	4424.709961	4363.330078	4424.709961	4424.709961	0
2002-02-28	4396.089844	4482.259766	4383.370117	4462.990234	4462.990234	0
2002-03-01	4442.399902	4495.310059	4436.939941	4486.419922	4486.419922	0
2002-03-04	4538.709961	4626.680176	4538.709961	4607.439941	4607.439941	0
2002-03-05	4608.220215	4620.759766	4566.529785	4580.750000	4580.750000	0
2002-03-06	4564.990234	4605.479980	4542.560059	4588.140137	4588.140137	0
2002-03-07	4626.919922	4671.000000	4606.370117	4616.500000	4616.500000	0
2002-03-08	4590.500000	4656.529785	4590.500000	4629.109863	4629.109863	0
2002-03-11	4619.770020	4642.560059	4577.839844	4586.750000	4586.750000	0
2002-03-12	4578.240234	4582.399902	4517.899902	4550.649902	4550.649902	0
2002-03-13	4551.520020	4601.979980	4523.770020	4523.770020	4523.770020	0
2002-03-14	4514.919922	4567.770020	4514.859863	4546.839844	4546.839844	0
2002-03-15	4540.100098	4588.330078	4514.720215	4588.330078	4588.330078	0
2002-03-18	4600.790039	4652.540039	4600.790039	4625.810059	4625.810059	0
2002-03-19	4636.330078	4650.890137	4613.200195	4644.930176	4644.930176	0
2002-03-20	4640.819824	4652.430176	4597.470215	4603.799805	4603.799805	0
2002-03-21	4582.500000	4621.779785	4569.399902	4579.899902	4579.899902	0
2002-03-22	4599.000000	4620.990234	4577.819824	4601.569824	4601.569824	0
2002-03-25	4597.310059	4651.689941	4586.479980	4588.359863	4588.359863	0
2002-03-26	4580.970215	4646.000000	4565.270020	4628.069824	4628.069824	0
2002-03-27	4645.080078	4645.080078	4605.250000	4623.200195	4623.200195	0
2002-03-28	4632.069824	4696.180176	4623.180176	4688.020020	4688.020020	0
2002-03-29	null	null	null	null	null	null
2002-04-01	null	null	null	null	null	null
2002-04-02	4673.029785	4688.160156	4626.459961	4627.330078	4627.330078	0
2002-04-03	4618.649902	4644.209961	4582.709961	4632.259766	4632.259766	0
2002-04-04	4604.879883	4621.569824	4536.549805	4538.310059	4538.310059	0
2002-04-05	4536.399902	4554.759766	4506.870117	4515.700195	4515.700195	0
2002-04-08	4504.180176	4511.870117	4415.750000	4431.879883	4431.879883	0
2002-04-09	4468.479980	4488.660156	4457.750000	4463.910156	4463.910156	0
2002-04-10	4435.259766	4539.689941	4424.509766	4521.830078	4521.830078	0
2002-04-11	4538.750000	4547.640137	4441.540039	4441.540039	4441.540039	0
2002-04-12	4452.589844	4485.609863	4437.540039	4468.290039	4468.290039	0
2002-04-15	4487.649902	4518.569824	4463.959961	4502.490234	4502.490234	0
2002-04-16	4522.910156	4601.790039	4520.109863	4598.740234	4598.740234	0
2002-04-17	4635.140137	4653.100098	4594.029785	4597.299805	4597.299805	0
2002-04-18	4581.950195	4645.100098	4572.910156	4588.830078	4588.830078	0
2002-04-19	4563.250000	4616.379883	4551.879883	4606.419922	4606.419922	0
2002-04-22	4597.209961	4597.709961	4523.089844	4559.459961	4559.459961	0
2002-04-23	4566.040039	4593.589844	4526.709961	4562.549805	4562.549805	0
2002-04-24	4556.700195	4586.419922	4514.819824	4528.000000	4528.000000	0
2002-04-25	4501.770020	4513.310059	4401.770020	4455.990234	4455.990234	0
2002-04-26	4463.189941	4509.680176	4447.529785	4453.080078	4453.080078	0
2002-04-29	4432.129883	4445.629883	4391.959961	4430.379883	4430.379883	0
2002-04-30	4414.629883	4462.740234	4390.979980	4462.740234	4462.740234	0
2002-05-01	null	null	null	null	null	null
2002-05-02	4474.629883	4494.790039	4421.560059	4421.560059	4421.560059	0
2002-05-03	4408.000000	4474.270020	4352.339844	4354.919922	4354.919922	0
2002-05-06	4361.649902	4389.729980	4338.029785	4367.259766	4367.259766	0
2002-05-07	4324.399902	4342.660156	4239.720215	4296.399902	4296.399902	0
2002-05-08	4335.379883	4404.020020	4335.379883	4404.020020	4404.020020	0
2002-05-09	4426.450195	4428.649902	4373.540039	4386.859863	4386.859863	0
2002-05-10	4365.459961	4391.540039	4324.430176	4329.839844	4329.839844	0
2002-05-13	4291.529785	4377.089844	4281.950195	4375.390137	4375.390137	0
2002-05-14	4392.419922	4463.450195	4359.589844	4447.120117	4447.120117	0
2002-05-15	4478.299805	4493.250000	4438.629883	4471.270020	4471.270020	0
2002-05-16	4455.169922	4489.250000	4440.339844	4466.359863	4466.359863	0
2002-05-17	4474.540039	4497.459961	4432.919922	4442.939941	4442.939941	0
2002-05-20	4454.890137	4467.629883	4387.700195	4400.750000	4400.750000	0
2002-05-21	4392.229980	4439.879883	4369.819824	4399.200195	4399.200195	0
2002-05-22	4374.759766	4394.240234	4311.790039	4326.290039	4326.290039	0
2002-05-23	4340.120117	4369.410156	4314.129883	4341.589844	4341.589844	0
2002-05-24	4375.229980	4381.700195	4328.970215	4337.430176	4337.430176	0
2002-05-27	4334.879883	4401.709961	4333.649902	4360.709961	4360.709961	0
2002-05-28	4380.060059	4418.729980	4332.140137	4339.569824	4339.569824	0
2002-05-29	4331.919922	4354.009766	4319.509766	4334.850098	4334.850098	0
2002-05-30	4333.549805	4334.370117	4249.850098	4260.140137	4260.140137	0
2002-05-31	4264.919922	4301.470215	4251.009766	4274.640137	4274.640137	0
2002-06-03	4247.580078	4294.500000	4225.910156	4227.149902	4227.149902	0
2002-06-04	4175.339844	4177.850098	4065.879883	4065.879883	4065.879883	0
2002-06-05	4107.910156	4124.299805	4068.229980	4079.510010	4079.510010	0
2002-06-06	4101.850098	4165.160156	4090.909912	4098.180176	4098.180176	0
2002-06-07	4025.659912	4032.030029	3968.669922	4020.270020	4020.270020	0
2002-06-10	4055.000000	4077.139893	4000.959961	4024.939941	4024.939941	0
2002-06-11	4035.679932	4114.080078	4017.570068	4109.370117	4109.370117	0
2002-06-12	4058.110107	4058.110107	3998.100098	4004.760010	4004.760010	0
2002-06-13	4041.739990	4059.250000	3934.639893	3957.330078	3957.330078	0
2002-06-14	3915.040039	3925.350098	3785.409912	3843.070068	3843.070068	0
2002-06-17	3878.429932	4012.750000	3872.899902	4010.360107	4010.360107	0
2002-06-18	4048.790039	4048.790039	3977.919922	4004.929932	4004.929932	0
2002-06-19	3933.229980	3958.439941	3905.969971	3935.580078	3935.580078	0
2002-06-20	3892.080078	3919.659912	3819.419922	3832.070068	3832.070068	0
2002-06-21	3789.270020	3886.949951	3736.229980	3799.530029	3799.530029	0
2002-06-24	3796.570068	3823.889893	3664.169922	3669.239990	3669.239990	0
2002-06-25	3733.179932	3779.560059	3721.870117	3766.399902	3766.399902	0
2002-06-26	3583.830078	3702.629883	3561.239990	3701.129883	3701.129883	0
2002-06-27	3765.409912	3801.659912	3709.850098	3742.780029	3742.780029	0
2002-06-28	3815.290039	3897.989990	3800.939941	3897.989990	3897.989990	0
2002-07-01	3886.120117	3973.929932	3857.949951	3897.370117	3897.370117	0
2002-07-02	3827.679932	3841.360107	3726.520020	3735.659912	3735.659912	0
2002-07-03	3731.540039	3776.689941	3623.330078	3623.330078	3623.330078	0
2002-07-04	3700.860107	3715.280029	3665.000000	3697.129883	3697.129883	0
2002-07-05	3739.860107	3864.540039	3734.659912	3863.280029	3863.280029	0
2002-07-08	3835.080078	3895.659912	3820.310059	3858.350098	3858.350098	0
2002-07-09	3839.889893	3886.429932	3756.399902	3819.010010	3819.010010	0
2002-07-10	3746.239990	3751.090088	3656.379883	3656.379883	3656.379883	0
2002-07-11	3574.300049	3605.459961	3512.100098	3512.100098	3512.100098	0
2002-07-12	3610.020020	3634.560059	3459.219971	3513.340088	3513.340088	0
2002-07-15	3504.300049	3559.000000	3322.790039	3323.739990	3323.739990	0
2002-07-16	3419.590088	3422.040039	3198.340088	3317.810059	3317.810059	0
2002-07-17	3276.280029	3471.909912	3273.719971	3440.879883	3440.879883	0
2002-07-18	3462.229980	3559.560059	3428.600098	3513.709961	3513.709961	0
2002-07-19	3492.310059	3492.310059	3319.379883	3324.040039	3324.040039	0
2002-07-22	3298.030029	3298.030029	3149.689941	3149.689941	3149.689941	0
2002-07-23	3184.709961	3243.439941	3026.729980	3070.159912	3070.159912	0
2002-07-24	3009.379883	3083.709961	2898.600098	3023.689941	3023.689941	0
2002-07-25	3175.520020	3203.600098	3067.889893	3149.719971	3149.719971	0
2002-07-26	3113.860107	3175.570068	3029.479980	3172.560059	3172.560059	0
2002-07-29	3203.830078	3395.830078	3183.929932	3395.830078	3395.830078	0
2002-07-30	3440.379883	3449.530029	3347.750000	3379.850098	3379.850098	0
2002-07-31	3429.449951	3515.699951	3320.149902	3415.379883	3415.379883	0
2002-08-01	3426.939941	3460.780029	3231.659912	3240.709961	3240.709961	0
2002-08-02	3257.659912	3279.219971	3200.040039	3245.370117	3245.370117	0
2002-08-05	3281.689941	3281.689941	3115.379883	3115.379883	3115.379883	0
2002-08-06	3072.040039	3288.969971	3013.800049	3284.790039	3284.790039	0
2002-08-07	3300.520020	3374.939941	3258.020020	3270.510010	3270.510010	0
2002-08-08	3331.820068	3404.169922	3312.129883	3388.449951	3388.449951	0
2002-08-09	3414.070068	3449.459961	3338.820068	3447.939941	3447.939941	0
2002-08-12	3416.679932	3435.000000	3341.100098	3364.439941	3364.439941	0
2002-08-13	3386.510010	3402.260010	3307.080078	3390.229980	3390.229980	0
2002-08-14	3305.320068	3338.010010	3240.810059	3240.810059	3240.810059	0
2002-08-15	3341.360107	3392.870117	3314.159912	3375.010010	3375.010010	0
2002-08-16	3384.399902	3402.250000	3298.909912	3374.090088	3374.090088	0
2002-08-19	3344.770020	3493.010010	3344.239990	3493.010010	3493.010010	0
2002-08-20	3479.870117	3506.620117	3420.000000	3440.620117	3440.620117	0
2002-08-21	3446.800049	3543.250000	3441.290039	3485.209961	3485.209961	0
2002-08-22	3521.189941	3593.169922	3517.139893	3592.600098	3592.600098	0
2002-08-23	3601.409912	3601.409912	3515.600098	3526.090088	3526.090088	0
2002-08-26	3505.090088	3558.830078	3471.280029	3471.280029	3471.280029	0
2002-08-27	3498.810059	3574.389893	3477.090088	3570.500000	3570.500000	0
2002-08-28	3522.479980	3523.459961	3410.949951	3419.739990	3419.739990	0
2002-08-29	3402.709961	3412.379883	3309.949951	3331.770020	3331.770020	0
2002-08-30	3367.090088	3401.000000	3315.520020	3366.209961	3366.209961	0
2002-09-02	3345.639893	3349.169922	3271.600098	3272.760010	3272.760010	0
2002-09-03	3250.139893	3250.139893	3121.000000	3126.600098	3126.600098	0
2002-09-04	3102.760010	3177.620117	3068.120117	3168.699951	3168.699951	0
2002-09-05	3210.320068	3214.129883	3068.110107	3139.389893	3139.389893	0
2002-09-06	3146.209961	3246.669922	3104.909912	3246.669922	3246.669922	0
2002-09-09	3233.070068	3233.219971	3185.260010	3199.820068	3199.820068	0
2002-09-10	3244.080078	3306.250000	3240.479980	3299.639893	3299.639893	0
2002-09-11	3325.699951	3402.300049	3278.840088	3397.020020	3397.020020	0
2002-09-12	3347.050049	3365.770020	3239.389893	3241.840088	3241.840088	0
2002-09-13	3212.909912	3217.669922	3115.010010	3156.169922	3156.169922	0
2002-09-16	3188.149902	3195.500000	3117.179932	3141.949951	3141.949951	0
2002-09-17	3223.909912	3248.229980	3091.820068	3112.830078	3112.830078	0
2002-09-18	3056.580078	3069.689941	2977.149902	3000.979980	3000.979980	0
2002-09-19	3011.439941	3034.120117	2923.330078	2927.179932	2927.179932	0
2002-09-20	2900.850098	2975.399902	2866.520020	2890.820068	2890.820068	0
2002-09-23	2893.330078	2950.919922	2773.129883	2794.310059	2794.310059	0
2002-09-24	2797.000000	2822.010010	2666.040039	2742.810059	2742.810059	0
2002-09-25	2707.219971	2851.209961	2702.360107	2785.379883	2785.379883	0
2002-09-26	2846.439941	2961.459961	2835.750000	2961.459961	2961.459961	0
2002-09-27	2944.659912	2978.939941	2918.270020	2950.520020	2950.520020	0
2002-09-30	2846.370117	2851.770020	2725.919922	2777.449951	2777.449951	0
2002-10-01	2789.689941	2831.189941	2750.870117	2828.560059	2828.560059	0
2002-10-02	2914.520020	2958.919922	2860.810059	2940.840088	2940.840088	0
2002-10-03	2892.870117	2950.800049	2860.270020	2861.040039	2861.040039	0
2002-10-04	2838.629883	2854.959961	2754.879883	2765.899902	2765.899902	0
2002-10-07	2730.610107	2772.030029	2698.530029	2733.560059	2733.560059	0
2002-10-08	2752.500000	2786.570068	2678.620117	2694.229980	2694.229980	0
2002-10-09	2726.760010	2729.179932	2622.489990	2656.449951	2656.449951	0
2002-10-10	2612.050049	2764.169922	2612.030029	2758.530029	2758.530029	0
2002-10-11	2789.270020	2902.270020	2778.610107	2902.270020	2902.270020	0
2002-10-14	2876.479980	2949.959961	2849.729980	2885.270020	2885.270020	0
2002-10-15	2928.590088	3092.419922	2923.659912	3086.030029	3086.030029	0
2002-10-16	3036.850098	3180.290039	3028.030029	3067.699951	3067.699951	0
2002-10-17	3117.209961	3208.080078	3116.679932	3183.080078	3183.080078	0
2002-10-18	3235.280029	3236.149902	3087.550049	3156.989990	3156.989990	0
2002-10-21	3140.429932	3175.620117	3110.060059	3156.929932	3156.929932	0
2002-10-22	3162.639893	3228.350098	3114.129883	3121.010010	3121.010010	0
2002-10-23	3147.189941	3164.639893	2992.229980	2992.229980	2992.229980	0
2002-10-24	3046.840088	3103.969971	3015.870117	3075.129883	3075.129883	0
2002-10-25	3026.229980	3087.800049	3011.760010	3056.879883	3056.879883	0
2002-10-28	3143.659912	3165.379883	3106.770020	3120.850098	3120.850098	0
2002-10-29	3091.899902	3129.350098	2962.439941	2965.110107	2965.110107	0
2002-10-30	3015.649902	3095.449951	2968.750000	3084.219971	3084.219971	0
2002-10-31	3081.959961	3162.959961	3056.659912	3150.040039	3150.040039	0
2002-11-01	3125.199951	3132.239990	3035.229980	3109.510010	3109.510010	0
2002-11-04	3168.300049	3218.669922	3159.479980	3218.669922	3218.669922	0
2002-11-05	3197.560059	3264.070068	3175.800049	3247.389893	3247.389893	0
2002-11-06	3310.439941	3310.439941	3194.080078	3212.860107	3212.860107	0
2002-11-07	3241.120117	3249.719971	3104.169922	3111.719971	3111.719971	0
2002-11-08	3084.209961	3134.270020	3043.100098	3058.179932	3058.179932	0
2002-11-11	3035.840088	3071.500000	3002.649902	3053.699951	3053.699951	0
2002-11-12	3042.840088	3093.120117	3027.919922	3064.639893	3064.639893	0
2002-11-13	3048.250000	3061.889893	2979.429932	3034.810059	3034.810059	0
2002-11-14	3023.070068	3152.040039	2996.479980	3148.600098	3148.600098	0
2002-11-15	3181.669922	3199.189941	3137.330078	3162.389893	3162.389893	0
2002-11-18	3168.969971	3233.610107	3167.219971	3208.469971	3208.469971	0
2002-11-19	3172.780029	3189.139893	3154.320068	3177.229980	3177.229980	0
2002-11-20	3194.020020	3209.219971	3124.429932	3153.500000	3153.500000	0
2002-11-21	3233.030029	3290.800049	3212.129883	3290.169922	3290.169922	0
2002-11-22	3298.350098	3314.830078	3265.449951	3305.780029	3305.780029	0
2002-11-25	3330.149902	3349.360107	3277.969971	3295.679932	3295.679932	0
2002-11-26	3296.949951	3307.699951	3200.129883	3215.189941	3215.189941	0
2002-11-27	3225.080078	3323.370117	3181.840088	3313.760010	3313.760010	0
2002-11-28	3333.010010	3357.409912	3303.219971	3329.989990	3329.989990	0
2002-11-29	3339.060059	3360.290039	3302.800049	3326.649902	3326.649902	0
2002-12-02	3327.070068	3393.040039	3291.899902	3298.760010	3298.760010	0
2002-12-03	3307.100098	3319.209961	3219.139893	3222.260010	3222.260010	0
2002-12-04	3200.169922	3236.510010	3170.300049	3199.840088	3199.840088	0
2002-12-05	3221.879883	3283.780029	3142.689941	3158.040039	3158.040039	0
2002-12-06	3178.100098	3202.090088	3096.979980	3185.770020	3185.770020	0
2002-12-09	3234.060059	3234.060059	3108.600098	3115.629883	3115.629883	0
2002-12-10	3096.899902	3147.840088	3087.010010	3142.750000	3142.750000	0
2002-12-11	3169.199951	3204.139893	3148.639893	3190.090088	3190.090088	0
2002-12-12	3184.870117	3200.300049	3121.280029	3137.429932	3137.429932	0
2002-12-13	3134.399902	3134.489990	3054.120117	3076.850098	3076.850098	0
2002-12-16	3071.129883	3181.169922	3064.600098	3173.850098	3173.850098	0
2002-12-17	3200.919922	3202.810059	3126.409912	3138.610107	3138.610107	0
2002-12-18	3121.270020	3132.520020	3077.389893	3077.389893	3077.389893	0
2002-12-19	3094.870117	3134.360107	3016.870117	3054.209961	3054.209961	0
2002-12-20	3057.179932	3118.280029	3042.600098	3082.850098	3082.850098	0
2002-12-23	3105.939941	3105.939941	3067.719971	3087.620117	3087.620117	0
2002-12-24	3114.169922	3114.169922	3062.060059	3081.280029	3081.280029	0
2002-12-25	null	null	null	null	null	null
2002-12-26	null	null	null	null	null	null
2002-12-27	3047.260010	3080.570068	3004.060059	3011.830078	3011.830078	0
2002-12-30	3021.669922	3029.520020	2984.020020	3025.139893	3025.139893	0
2002-12-31	3028.149902	3091.979980	3023.129883	3063.909912	3063.909912	0
2003-01-01	null	null	null	null	null	null
2003-01-02	3057.060059	3195.020020	3048.679932	3195.020020	3195.020020	0
2003-01-03	3204.850098	3217.780029	3174.979980	3187.879883	3187.879883	0
2003-01-06	3204.810059	3228.889893	3156.570068	3210.270020	3210.270020	0
2003-01-07	3231.729980	3232.340088	3145.669922	3160.989990	3160.989990	0
2003-01-08	3136.929932	3159.419922	3090.100098	3094.090088	3094.090088	0
2003-01-09	3097.959961	3152.290039	3054.330078	3152.290039	3152.290039	0
2003-01-10	3142.010010	3189.310059	3108.560059	3160.129883	3160.129883	0
2003-01-13	3169.889893	3210.959961	3159.939941	3169.820068	3169.820068	0
2003-01-14	3181.219971	3201.260010	3147.810059	3174.030029	3174.030029	0
2003-01-15	3198.739990	3215.489990	3127.989990	3134.659912	3134.659912	0
2003-01-16	3128.530029	3168.379883	3115.620117	3142.590088	3142.590088	0
2003-01-17	3117.949951	3128.899902	3055.669922	3056.929932	3056.929932	0
2003-01-20	3049.600098	3076.310059	3017.159912	3020.070068	3020.070068	0
2003-01-21	3038.709961	3064.090088	2989.949951	2992.389893	2992.389893	0
2003-01-22	2992.169922	3010.840088	2908.570068	2931.379883	2931.379883	0
2003-01-23	2962.500000	2975.199951	2913.780029	2917.969971	2917.969971	0
2003-01-24	2936.419922	2969.570068	2894.580078	2898.600098	2898.600098	0
2003-01-27	2874.399902	2874.889893	2794.500000	2795.780029	2795.780029	0
2003-01-28	2824.050049	2846.810059	2781.870117	2800.070068	2800.070068	0
2003-01-29	2792.060059	2840.090088	2733.510010	2840.050049	2840.050049	0
2003-01-30	2866.510010	2920.649902	2860.739990	2914.129883	2914.129883	0
2003-01-31	2865.239990	2943.159912	2847.979980	2937.879883	2937.879883	0
2003-02-03	2973.929932	2983.989990	2941.449951	2957.790039	2957.790039	0
2003-02-04	2934.179932	2937.909912	2861.419922	2863.500000	2863.500000	0
2003-02-05	2859.510010	2890.090088	2828.709961	2884.620117	2884.620117	0
2003-02-06	2862.139893	2911.290039	2820.260010	2836.179932	2836.179932	0
2003-02-07	2842.489990	2854.699951	2792.629883	2796.659912	2796.659912	0
2003-02-10	2801.739990	2802.070068	2756.969971	2772.260010	2772.260010	0
2003-02-11	2803.639893	2846.669922	2795.949951	2841.840088	2841.840088	0
2003-02-12	2806.219971	2811.719971	2770.469971	2770.620117	2770.620117	0
2003-02-13	2743.590088	2786.209961	2727.030029	2758.649902	2758.649902	0
2003-02-14	2766.939941	2859.429932	2765.550049	2827.750000	2827.750000	0
2003-02-17	2870.399902	2884.860107	2858.590088	2882.120117	2882.120117	0
2003-02-18	2892.169922	2950.750000	2864.750000	2938.629883	2938.629883	0
2003-02-19	2932.139893	2932.389893	2859.189941	2859.189941	2859.189941	0
2003-02-20	2857.739990	2883.780029	2792.520020	2804.489990	2804.489990	0
2003-02-21	2781.729980	2829.830078	2781.729980	2829.830078	2829.830078	0
2003-02-24	2828.840088	2850.050049	2785.610107	2785.610107	2785.610107	0
2003-02-25	2757.510010	2762.800049	2683.370117	2683.370117	2683.370117	0
2003-02-26	2725.679932	2727.889893	2647.600098	2658.570068	2658.570068	0
2003-02-27	2640.610107	2725.429932	2633.189941	2715.800049	2715.800049	0
2003-02-28	2737.459961	2757.840088	2693.929932	2754.070068	2754.070068	0
2003-03-03	2770.679932	2796.729980	2746.909912	2762.250000	2762.250000	0
2003-03-04	2732.419922	2734.429932	2650.899902	2676.340088	2676.340088	0
2003-03-05	2652.010010	2674.360107	2633.639893	2655.070068	2655.070068	0
2003-03-06	2669.429932	2676.820068	2620.610107	2634.530029	2634.530029	0
2003-03-07	2613.070068	2617.159912	2569.330078	2574.909912	2574.909912	0
2003-03-10	2581.209961	2582.500000	2513.610107	2513.610107	2513.610107	0
2003-03-11	2499.500000	2523.739990	2466.629883	2493.419922	2493.419922	0
2003-03-12	2507.340088	2518.290039	2401.149902	2403.040039	2403.040039	0
2003-03-13	2453.050049	2554.709961	2431.449951	2554.709961	2554.709961	0
2003-03-14	2598.550049	2740.010010	2595.300049	2740.010010	2740.010010	0
2003-03-17	2632.840088	2864.209961	2623.050049	2831.729980	2831.729980	0
2003-03-18	2847.870117	2902.010010	2762.370117	2794.889893	2794.889893	0
2003-03-19	2807.949951	2889.439941	2770.800049	2837.679932	2837.679932	0
2003-03-20	2814.850098	2858.310059	2765.929932	2794.830078	2794.830078	0
2003-03-21	2821.409912	2909.959961	2820.909912	2890.679932	2890.679932	0
2003-03-24	2841.629883	2842.500000	2723.969971	2726.850098	2726.850098	0
2003-03-25	2707.459961	2803.149902	2644.219971	2795.790039	2795.790039	0
2003-03-26	2791.949951	2842.620117	2766.909912	2787.560059	2787.560059	0
2003-03-27	2756.290039	2760.820068	2701.199951	2722.840088	2722.840088	0
2003-03-28	2735.909912	2744.949951	2678.909912	2733.000000	2733.000000	0
2003-03-31	2666.770020	2666.770020	2596.830078	2618.459961	2618.459961	0
2003-04-01	2627.719971	2668.070068	2599.280029	2635.040039	2635.040039	0
2003-04-02	2683.229980	2751.830078	2682.239990	2743.879883	2743.879883	0
2003-04-03	2759.239990	2829.709961	2745.780029	2788.689941	2788.689941	0
2003-04-04	2798.810059	2863.330078	2763.479980	2837.959961	2837.959961	0
2003-04-07	2920.889893	2989.350098	2910.600098	2935.679932	2935.679932	0
2003-04-08	2905.889893	2938.199951	2885.590088	2893.510010	2893.510010	0
2003-04-09	2863.560059	2938.320068	2836.699951	2888.030029	2888.030029	0
2003-04-10	2847.429932	2861.250000	2802.959961	2808.580078	2808.580078	0
2003-04-11	2823.689941	2893.409912	2819.290039	2838.139893	2838.139893	0
2003-04-14	2836.340088	2883.469971	2808.090088	2874.979980	2874.979980	0
2003-04-15	2914.870117	2958.090088	2895.020020	2921.520020	2921.520020	0
2003-04-16	2972.110107	2991.060059	2884.350098	2895.159912	2895.159912	0
2003-04-17	2865.340088	2913.280029	2851.750000	2898.610107	2898.610107	0
2003-04-18	null	null	null	null	null	null
2003-04-21	null	null	null	null	null	null
2003-04-22	2916.169922	2922.419922	2861.629883	2914.600098	2914.600098	0
2003-04-23	2971.070068	3000.909912	2945.060059	2962.669922	2962.669922	0
2003-04-24	2936.290039	2985.919922	2898.379883	2903.040039	2903.040039	0
2003-04-25	2904.689941	2927.669922	2861.860107	2866.739990	2866.739990	0
2003-04-28	2858.830078	2956.070068	2853.229980	2949.570068	2949.570068	0
2003-04-29	2980.860107	3015.419922	2940.800049	2940.800049	2940.800049	0
2003-04-30	2946.260010	2986.270020	2930.090088	2953.669922	2953.669922	0
2003-05-01	null	null	null	null	null	null
2003-05-02	2945.409912	2963.120117	2904.699951	2963.120117	2963.120117	0
2003-05-05	2992.510010	3035.600098	2991.330078	2996.219971	2996.219971	0
2003-05-06	2998.360107	3057.560059	2980.810059	3057.560059	3057.560059	0
2003-05-07	3053.820068	3070.620117	3015.600098	3023.959961	3023.959961	0
2003-05-08	3017.979980	3035.590088	2929.070068	2939.169922	2939.169922	0
2003-05-09	2942.739990	2967.889893	2902.320068	2967.889893	2967.889893	0
2003-05-12	2992.659912	3003.620117	2922.139893	2962.629883	2962.629883	0
2003-05-13	2970.679932	2980.780029	2938.399902	2963.629883	2963.629883	0
2003-05-14	2958.139893	3016.560059	2952.659912	2961.830078	2961.830078	0
2003-05-15	2964.889893	3006.580078	2942.669922	2995.979980	2995.979980	0
2003-05-16	2997.590088	3036.270020	2966.570068	2994.870117	2994.870117	0
2003-05-19	2932.979980	2932.979980	2861.080078	2867.290039	2867.290039	0
2003-05-20	2866.250000	2890.139893	2829.879883	2877.260010	2877.260010	0
2003-05-21	2876.449951	2881.439941	2814.340088	2881.199951	2881.199951	0
2003-05-22	2886.050049	2905.949951	2876.820068	2903.270020	2903.270020	0
2003-05-23	2930.639893	2930.989990	2861.770020	2897.159912	2897.159912	0
2003-05-26	2883.790039	2926.050049	2881.070068	2885.520020	2885.520020	0
2003-05-27	2880.100098	2903.719971	2826.810059	2891.469971	2891.469971	0
2003-05-28	2931.010010	2956.020020	2907.300049	2949.610107	2949.610107	0
2003-05-29	2934.780029	2985.850098	2929.389893	2969.179932	2969.179932	0
2003-05-30	2939.330078	3012.919922	2934.860107	2991.750000	2991.750000	0
2003-06-02	3018.659912	3048.320068	2990.320068	3048.320068	3048.320068	0
2003-06-03	3017.000000	3039.409912	3002.989990	3039.409912	3039.409912	0
2003-06-04	3049.040039	3079.909912	3026.149902	3063.850098	3063.850098	0
2003-06-05	3075.770020	3085.820068	3010.679932	3034.070068	3034.070068	0
2003-06-06	3039.780029	3112.780029	3039.780029	3093.209961	3093.209961	0
2003-06-09	3074.989990	3088.040039	3044.000000	3055.229980	3055.229980	0
2003-06-10	3047.020020	3090.100098	3042.969971	3083.850098	3083.850098	0
2003-06-11	3103.040039	3130.850098	3088.969971	3121.899902	3121.899902	0
2003-06-12	3137.060059	3170.729980	3135.570068	3152.159912	3152.159912	0
2003-06-13	3143.989990	3160.110107	3098.699951	3108.939941	3108.939941	0
2003-06-16	3095.959961	3177.429932	3077.139893	3174.489990	3174.489990	0
2003-06-17	3213.030029	3224.320068	3179.370117	3200.750000	3200.750000	0
2003-06-18	3199.120117	3228.600098	3178.649902	3213.929932	3213.929932	0
2003-06-19	3219.399902	3220.870117	3156.550049	3164.909912	3164.909912	0
2003-06-20	3125.939941	3198.679932	3125.939941	3190.110107	3190.110107	0
2003-06-23	3164.340088	3176.139893	3112.969971	3119.239990	3119.239990	0
2003-06-24	3122.090088	3129.879883	3089.270020	3103.340088	3103.340088	0
2003-06-25	3115.229980	3131.649902	3083.459961	3108.699951	3108.699951	0
2003-06-26	3071.189941	3129.370117	3071.189941	3103.459961	3103.459961	0
2003-06-27	3122.070068	3128.439941	3089.060059	3109.020020	3109.020020	0
2003-06-30	3094.820068	3137.189941	3084.100098	3084.100098	3084.100098	0
2003-07-01	3085.590088	3098.129883	3008.719971	3013.000000	3013.000000	0
2003-07-02	3056.899902	3087.750000	3049.360107	3079.070068	3079.070068	0
2003-07-03	3093.100098	3105.760010	3054.629883	3092.090088	3092.090088	0
2003-07-04	3077.750000	3091.239990	3072.399902	3072.399902	3072.399902	0
2003-07-07	3097.919922	3182.189941	3097.379883	3182.189941	3182.189941	0
2003-07-08	3169.350098	3203.350098	3148.000000	3177.969971	3177.969971	0
2003-07-09	3177.199951	3190.520020	3131.850098	3139.929932	3139.929932	0
2003-07-10	3121.310059	3135.350098	3091.179932	3098.280029	3098.280029	0
2003-07-11	3080.469971	3140.000000	3076.350098	3138.270020	3138.270020	0
2003-07-14	3153.439941	3202.149902	3141.850098	3190.229980	3190.229980	0
2003-07-15	3175.889893	3206.030029	3169.370117	3179.330078	3179.330078	0
2003-07-16	3186.850098	3199.399902	3144.320068	3150.719971	3150.719971	0
2003-07-17	3139.379883	3144.959961	3102.379883	3129.370117	3129.370117	0
2003-07-18	3128.870117	3156.820068	3119.080078	3129.209961	3129.209961	0
2003-07-21	3157.760010	3157.760010	3072.320068	3081.060059	3081.060059	0
2003-07-22	3088.310059	3093.790039	3060.500000	3092.620117	3092.620117	0
2003-07-23	3100.439941	3114.399902	3080.040039	3089.409912	3089.409912	0
2003-07-24	3069.360107	3158.040039	3069.209961	3156.860107	3156.860107	0
2003-07-25	3118.060059	3136.340088	3097.199951	3109.320068	3109.320068	0
2003-07-28	3142.300049	3180.899902	3138.510010	3164.929932	3164.929932	0
2003-07-29	3155.530029	3188.699951	3128.639893	3142.389893	3142.389893	0
2003-07-30	3132.719971	3183.030029	3131.850098	3172.510010	3172.510010	0
2003-07-31	3189.280029	3220.550049	3155.469971	3210.270020	3210.270020	0
2003-08-01	3200.810059	3219.149902	3158.600098	3169.629883	3169.629883	0
2003-08-04	3164.010010	3206.179932	3126.189941	3142.000000	3142.000000	0
2003-08-05	3167.850098	3203.419922	3150.879883	3187.610107	3187.610107	0
2003-08-06	3154.060059	3158.500000	3119.629883	3126.149902	3126.149902	0
2003-08-07	3156.610107	3156.610107	3105.370117	3130.560059	3130.560059	0
2003-08-08	3145.870117	3189.679932	3133.600098	3165.489990	3165.489990	0
2003-08-11	3184.370117	3200.350098	3168.929932	3188.320068	3188.320068	0
2003-08-12	3201.889893	3223.409912	3190.879883	3208.229980	3208.229980	0
2003-08-13	3232.290039	3237.179932	3198.530029	3208.060059	3208.060059	0
2003-08-14	3217.879883	3261.699951	3197.030029	3261.699951	3261.699951	0
2003-08-15	3266.239990	3298.820068	3262.500000	3279.209961	3279.209961	0
2003-08-18	3301.250000	3301.250000	3261.439941	3301.080078	3301.080078	0
2003-08-19	3315.669922	3323.889893	3291.250000	3310.699951	3310.699951	0
2003-08-20	3304.479980	3304.479980	3264.270020	3280.340088	3280.340088	0
2003-08-21	3294.629883	3330.810059	3294.629883	3306.419922	3306.419922	0
2003-08-22	3297.520020	3347.550049	3297.520020	3328.989990	3328.989990	0
2003-08-25	3310.310059	3311.729980	3284.270020	3291.360107	3291.360107	0
2003-08-26	3303.010010	3317.050049	3249.879883	3256.689941	3256.689941	0
2003-08-27	3279.530029	3284.699951	3261.830078	3280.020020	3280.020020	0
2003-08-28	3290.110107	3336.010010	3280.159912	3322.949951	3322.949951	0
2003-08-29	3336.989990	3353.939941	3311.100098	3311.419922	3311.419922	0
2003-09-01	3335.540039	3373.209961	3335.540039	3358.520020	3358.520020	0
2003-09-02	3368.580078	3376.770020	3342.270020	3363.929932	3363.929932	0
2003-09-03	3399.189941	3435.790039	3393.669922	3422.780029	3422.780029	0
2003-09-04	3420.570068	3432.800049	3394.449951	3410.689941	3410.689941	0
2003-09-05	3408.929932	3422.229980	3370.989990	3392.750000	3392.750000	0
2003-09-08	3385.659912	3417.689941	3381.850098	3409.719971	3409.719971	0
2003-09-09	3430.929932	3431.370117	3364.050049	3375.260010	3375.260010	0
2003-09-10	3364.070068	3364.879883	3324.399902	3328.709961	3328.709961	0
2003-09-11	3309.439941	3359.639893	3305.770020	3348.250000	3348.250000	0
2003-09-12	3364.949951	3375.639893	3301.540039	3322.560059	3322.560059	0
2003-09-15	3336.590088	3361.189941	3332.939941	3338.360107	3338.360107	0
2003-09-16	3344.090088	3386.649902	3333.540039	3386.409912	3386.409912	0
2003-09-17	3408.709961	3423.090088	3393.479980	3393.929932	3393.929932	0
2003-09-18	3394.729980	3415.070068	3376.919922	3415.010010	3415.010010	0
2003-09-19	3422.850098	3424.260010	3367.139893	3373.639893	3373.639893	0
2003-09-22	3334.620117	3336.649902	3269.530029	3282.949951	3282.949951	0
2003-09-23	3290.620117	3298.750000	3241.320068	3266.040039	3266.040039	0
2003-09-24	3284.810059	3300.010010	3262.209961	3263.780029	3263.780029	0
2003-09-25	3220.899902	3243.689941	3209.879883	3230.540039	3230.540039	0
2003-09-26	3209.770020	3231.199951	3177.959961	3216.760010	3216.760010	0
2003-09-29	3215.659912	3243.199951	3175.030029	3188.709961	3188.709961	0
2003-09-30	3191.929932	3208.649902	3110.929932	3134.989990	3134.989990	0
2003-10-01	3137.100098	3191.010010	3122.360107	3191.010010	3191.010010	0
2003-10-02	3219.610107	3228.409912	3182.429932	3192.939941	3192.939941	0
2003-10-03	3202.090088	3299.879883	3197.570068	3296.360107	3296.360107	0
2003-10-06	3291.850098	3297.169922	3271.370117	3281.360107	3281.360107	0
2003-10-07	3290.350098	3290.959961	3229.340088	3254.750000	3254.750000	0
2003-10-08	3244.659912	3292.830078	3233.739990	3248.610107	3248.610107	0
2003-10-09	3266.820068	3324.989990	3245.080078	3324.989990	3324.989990	0
2003-10-10	3329.790039	3345.360107	3294.389893	3306.120117	3306.120117	0
2003-10-13	3313.919922	3367.550049	3313.919922	3360.340088	3360.340088	0
2003-10-14	3380.139893	3380.139893	3336.260010	3344.899902	3344.899902	0
2003-10-15	3369.750000	3403.760010	3360.800049	3374.979980	3374.979980	0
2003-10-16	3361.820068	3393.629883	3347.229980	3357.489990	3357.489990	0
2003-10-17	3379.439941	3395.159912	3344.929932	3353.719971	3353.719971	0
2003-10-20	3339.290039	3374.870117	3334.399902	3358.800049	3358.800049	0
2003-10-21	3388.320068	3395.790039	3352.070068	3363.300049	3363.300049	0
2003-10-22	3358.659912	3370.810059	3297.000000	3302.699951	3302.699951	0
2003-10-23	3255.270020	3283.360107	3239.050049	3264.290039	3264.290039	0
2003-10-24	3264.780029	3277.310059	3249.469971	3266.270020	3266.270020	0
2003-10-27	3283.820068	3321.379883	3279.219971	3306.590088	3306.590088	0
2003-10-28	3316.810059	3353.959961	3316.810059	3352.149902	3352.149902	0
2003-10-29	3387.060059	3389.209961	3349.830078	3366.949951	3366.949951	0
2003-10-30	3365.139893	3417.639893	3346.850098	3387.360107	3387.360107	0
2003-10-31	3378.389893	3378.389893	3352.820068	3373.199951	3373.199951	0
2003-11-03	3381.979980	3442.250000	3377.229980	3439.070068	3439.070068	0
2003-11-04	3432.820068	3448.610107	3407.169922	3424.810059	3424.810059	0
2003-11-05	3404.550049	3421.409912	3384.820068	3393.250000	3393.250000	0
2003-11-06	3403.860107	3436.070068	3372.179932	3412.179932	3412.179932	0
2003-11-07	3434.620117	3472.830078	3434.290039	3453.129883	3453.129883	0
2003-11-10	3426.310059	3458.469971	3420.939941	3425.189941	3425.189941	0
2003-11-11	3402.250000	3411.699951	3388.120117	3406.050049	3406.050049	0
2003-11-12	3400.850098	3421.879883	3391.189941	3411.050049	3411.050049	0
2003-11-13	3444.260010	3449.800049	3401.580078	3412.550049	3412.550049	0
2003-11-14	3403.649902	3461.350098	3403.649902	3448.600098	3448.600098	0
2003-11-17	3396.030029	3406.530029	3355.860107	3359.300049	3359.300049	0
2003-11-18	3386.629883	3386.629883	3343.060059	3352.919922	3352.919922	0
2003-11-19	3311.739990	3350.110107	3298.260010	3343.379883	3343.379883	0
2003-11-20	3369.469971	3369.469971	3287.929932	3324.389893	3324.389893	0
2003-11-21	3318.439941	3366.120117	3317.659912	3366.120117	3366.120117	0
2003-11-24	3372.350098	3419.179932	3369.580078	3412.050049	3412.050049	0
2003-11-25	3418.169922	3437.199951	3414.159912	3418.149902	3418.149902	0
2003-11-26	3421.199951	3450.149902	3409.560059	3415.189941	3415.189941	0
2003-11-27	3425.149902	3437.820068	3416.659912	3431.659912	3431.659912	0
2003-11-28	3429.979980	3442.760010	3396.590088	3424.790039	3424.790039	0
2003-12-01	3450.659912	3490.750000	3440.719971	3490.260010	3490.260010	0
2003-12-02	3491.439941	3506.969971	3462.449951	3471.860107	3471.860107	0
2003-12-03	3467.330078	3511.280029	3466.080078	3501.929932	3501.929932	0
2003-12-04	3490.260010	3505.280029	3477.310059	3496.550049	3496.550049	0
2003-12-05	3481.209961	3491.800049	3442.370117	3457.139893	3457.139893	0
2003-12-08	3432.780029	3439.570068	3417.560059	3434.909912	3434.909912	0
2003-12-09	3459.830078	3478.570068	3451.179932	3456.120117	3456.120117	0
2003-12-10	3449.060059	3456.169922	3419.770020	3438.850098	3438.850098	0
2003-12-11	3449.979980	3469.110107	3441.010010	3467.899902	3467.899902	0
2003-12-12	3482.280029	3500.530029	3456.020020	3470.600098	3470.600098	0
2003-12-15	3521.639893	3522.449951	3487.129883	3490.419922	3490.419922	0
2003-12-16	3468.209961	3499.469971	3462.310059	3486.600098	3486.600098	0
2003-12-17	3494.229980	3494.370117	3461.830078	3479.870117	3479.870117	0
2003-12-18	3465.489990	3508.540039	3465.489990	3503.209961	3503.209961	0
2003-12-19	3517.709961	3525.800049	3488.530029	3502.040039	3502.040039	0
2003-12-22	3476.000000	3516.540039	3476.000000	3496.060059	3496.060059	0
2003-12-23	3508.649902	3514.800049	3490.489990	3500.090088	3500.090088	0
2003-12-24	3495.889893	3512.320068	3495.070068	3510.300049	3510.300049	0
2003-12-25	null	null	null	null	null	null
2003-12-26	null	null	null	null	null	null
2003-12-29	3508.389893	3521.969971	3508.389893	3520.790039	3520.790039	0
2003-12-30	3539.570068	3550.669922	3524.580078	3529.179932	3529.179932	0
2003-12-31	3498.760010	3566.760010	3498.760010	3557.899902	3557.899902	0
2004-01-01	null	null	null	null	null	null
2004-01-02	3563.389893	3597.020020	3554.570068	3596.800049	3596.800049	0
2004-01-05	3591.719971	3609.600098	3579.310059	3608.290039	3608.290039	0
2004-01-06	3612.870117	3612.870117	3583.800049	3595.820068	3595.820068	0
2004-01-07	3608.669922	3609.350098	3557.510010	3563.510010	3563.510010	0
2004-01-08	3584.250000	3615.830078	3583.810059	3592.729980	3592.729980	0
2004-01-09	3610.020020	3614.459961	3548.179932	3574.800049	3574.800049	0
2004-01-12	3564.840088	3571.360107	3548.219971	3560.100098	3560.100098	0
2004-01-13	3579.860107	3609.639893	3570.419922	3576.179932	3576.179932	0
2004-01-14	3577.040039	3617.520020	3567.489990	3612.550049	3612.550049	0
2004-01-15	3604.110107	3635.570068	3593.290039	3626.969971	3626.969971	0
2004-01-16	3639.689941	3681.790039	3639.689941	3671.800049	3671.800049	0
2004-01-19	3677.729980	3699.469971	3672.459961	3689.969971	3689.969971	0
2004-01-20	3687.280029	3694.000000	3657.149902	3660.189941	3660.189941	0
2004-01-21	3654.830078	3676.379883	3650.860107	3676.379883	3676.379883	0
2004-01-22	3703.229980	3713.830078	3689.389893	3695.600098	3695.600098	0
2004-01-23	3700.530029	3707.810059	3684.989990	3693.360107	3693.360107	0
2004-01-26	3693.290039	3693.290039	3670.070068	3675.719971	3675.719971	0
2004-01-27	3711.439941	3724.290039	3695.750000	3697.419922	3697.419922	0
2004-01-28	3675.600098	3714.449951	3675.300049	3706.790039	3706.790039	0
2004-01-29	3674.899902	3684.780029	3656.189941	3662.300049	3662.300049	0
2004-01-30	3684.689941	3688.340088	3638.439941	3638.439941	3638.439941	0
2004-02-02	3660.290039	3676.639893	3651.840088	3665.020020	3665.020020	0
2004-02-03	3667.770020	3672.590088	3623.290039	3638.209961	3638.209961	0
2004-02-04	3615.639893	3625.379883	3602.939941	3607.570068	3607.570068	0
2004-02-05	3596.219971	3638.570068	3594.709961	3610.310059	3610.310059	0
2004-02-06	3613.340088	3631.639893	3596.610107	3624.719971	3624.719971	0
2004-02-09	3637.290039	3679.669922	3637.290039	3663.729980	3663.729980	0
2004-02-10	3660.360107	3669.739990	3643.250000	3668.449951	3668.449951	0
2004-02-11	3672.590088	3687.199951	3664.120117	3677.850098	3677.850098	0
2004-02-12	3689.639893	3698.669922	3665.409912	3681.560059	3681.560059	0
2004-02-13	3674.429932	3686.060059	3644.320068	3649.340088	3649.340088	0
2004-02-16	3655.729980	3678.070068	3649.760010	3678.070068	3678.070068	0
2004-02-17	3681.860107	3710.820068	3681.860107	3703.820068	3703.820068	0
2004-02-18	3714.090088	3717.330078	3699.280029	3709.020020	3709.020020	0
2004-02-19	3718.780029	3761.330078	3715.979980	3759.320068	3759.320068	0
2004-02-20	3749.679932	3765.659912	3720.989990	3733.280029	3733.280029	0
2004-02-23	3741.479980	3757.139893	3727.860107	3731.149902	3731.149902	0
2004-02-24	3729.760010	3734.500000	3666.879883	3683.439941	3683.439941	0
2004-02-25	3692.179932	3710.419922	3674.169922	3702.629883	3702.629883	0
2004-02-26	3722.179932	3725.080078	3700.919922	3714.489990	3714.489990	0
2004-02-27	3736.340088	3760.060059	3725.439941	3725.439941	3725.439941	0
2004-03-01	3735.300049	3755.719971	3733.449951	3748.870117	3748.870117	0
2004-03-02	3767.830078	3785.360107	3758.989990	3785.360107	3785.360107	0
2004-03-03	3773.830078	3782.169922	3742.520020	3758.510010	3758.510010	0
2004-03-04	3772.129883	3778.459961	3754.729980	3776.939941	3776.939941	0
2004-03-05	3776.629883	3789.330078	3729.979980	3761.110107	3761.110107	0
2004-03-08	3772.750000	3785.580078	3769.520020	3781.379883	3781.379883	0
2004-03-09	3759.189941	3767.129883	3728.699951	3737.030029	3737.030029	0
2004-03-10	3717.929932	3761.250000	3713.659912	3758.090088	3758.090088	0
2004-03-11	3712.169922	3712.169922	3618.020020	3646.429932	3646.429932	0
2004-03-12	3597.949951	3667.639893	3569.729980	3661.780029	3661.780029	0
2004-03-15	3652.100098	3663.219971	3565.810059	3573.840088	3573.840088	0
2004-03-16	3572.389893	3600.770020	3543.110107	3588.040039	3588.040039	0
2004-03-17	3602.929932	3660.040039	3597.389893	3656.040039	3656.040039	0
2004-03-18	3648.570068	3653.570068	3585.070068	3589.979980	3589.979980	0
2004-03-19	3623.899902	3625.449951	3592.820068	3613.280029	3613.280029	0
2004-03-22	3580.429932	3581.699951	3512.679932	3539.219971	3539.219971	0
2004-03-23	3531.600098	3568.030029	3525.120117	3539.909912	3539.909912	0
2004-03-24	3538.320068	3562.659912	3489.530029	3518.449951	3518.449951	0
2004-03-25	3542.169922	3579.340088	3537.429932	3570.399902	3570.399902	0
2004-03-26	3602.659912	3606.860107	3577.500000	3592.389893	3592.389893	0
2004-03-29	3594.419922	3640.610107	3584.600098	3634.179932	3634.179932	0
2004-03-30	3628.909912	3633.590088	3602.590088	3620.100098	3620.100098	0
2004-03-31	3632.120117	3659.949951	3617.729980	3625.229980	3625.229980	0
2004-04-01	3647.959961	3673.060059	3624.189941	3669.979980	3669.979980	0
2004-04-02	3674.899902	3751.929932	3669.310059	3739.909912	3739.909912	0
2004-04-05	3753.189941	3794.199951	3747.500000	3781.199951	3781.199951	0
2004-04-06	3766.669922	3785.629883	3742.760010	3746.110107	3746.110107	0
2004-04-07	3752.780029	3769.229980	3727.229980	3734.560059	3734.560059	0
2004-04-08	3756.629883	3765.949951	3731.790039	3740.110107	3740.110107	0
2004-04-09	null	null	null	null	null	null
2004-04-12	null	null	null	null	null	null
2004-04-13	3765.800049	3794.250000	3764.550049	3774.689941	3774.689941	0
2004-04-14	3745.739990	3751.010010	3696.810059	3731.429932	3731.429932	0
2004-04-15	3719.459961	3747.469971	3713.840088	3722.760010	3722.760010	0
2004-04-16	3721.850098	3754.550049	3721.850098	3751.590088	3751.590088	0
2004-04-19	3741.949951	3754.959961	3721.979980	3743.429932	3743.429932	0
2004-04-20	3767.399902	3789.250000	3765.320068	3773.429932	3773.429932	0
2004-04-21	3733.689941	3758.510010	3729.889893	3743.149902	3743.149902	0
2004-04-22	3761.840088	3785.949951	3737.110107	3785.550049	3785.550049	0
2004-04-23	3808.919922	3829.219971	3808.919922	3811.429932	3811.429932	0
2004-04-26	3790.139893	3831.540039	3785.020020	3785.550049	3785.550049	0
2004-04-27	3787.310059	3801.479980	3777.540039	3782.090088	3782.090088	0
2004-04-28	3779.149902	3781.439941	3722.590088	3722.590088	3722.590088	0
2004-04-29	3717.419922	3723.659912	3667.250000	3689.389893	3689.389893	0
2004-04-30	3680.649902	3696.300049	3661.909912	3674.280029	3674.280029	0
2004-05-03	3652.300049	3709.560059	3651.949951	3705.479980	3705.479980	0
2004-05-04	3702.479980	3712.520020	3673.239990	3700.790039	3700.790039	0
2004-05-05	3684.629883	3734.689941	3681.590088	3729.379883	3729.379883	0
2004-05-06	3700.060059	3719.850098	3655.139893	3655.139893	3655.139893	0
2004-05-07	3655.370117	3666.100098	3623.600098	3653.179932	3653.179932	0
2004-05-10	3593.300049	3598.250000	3553.350098	3553.350098	3553.350098	0
2004-05-11	3570.350098	3608.050049	3570.350098	3606.409912	3606.409912	0
2004-05-12	3613.439941	3613.530029	3563.850098	3564.340088	3564.340088	0
2004-05-13	3591.149902	3614.239990	3578.540039	3614.239990	3614.239990	0
2004-05-14	3603.979980	3621.479980	3575.360107	3603.260010	3603.260010	0
2004-05-17	3553.070068	3557.679932	3520.610107	3553.020020	3553.020020	0
2004-05-18	3570.679932	3572.929932	3542.719971	3569.139893	3569.139893	0
2004-05-19	3598.020020	3652.489990	3597.000000	3643.320068	3643.320068	0
2004-05-20	3615.389893	3619.459961	3594.510010	3609.969971	3609.969971	0
2004-05-21	3627.080078	3639.570068	3591.479980	3607.020020	3607.020020	0
2004-05-24	3605.000000	3644.199951	3593.590088	3628.820068	3628.820068	0
2004-05-25	3611.189941	3621.300049	3598.310059	3610.530029	3610.530029	0
2004-05-26	3664.149902	3668.040039	3640.100098	3659.919922	3659.919922	0
2004-05-27	3670.469971	3694.820068	3668.929932	3679.370117	3679.370117	0
2004-05-28	3689.860107	3696.689941	3652.030029	3652.030029	3652.030029	0
2004-05-31	3645.820068	3677.729980	3644.620117	3669.629883	3669.629883	0
2004-06-01	3668.139893	3669.169922	3613.419922	3624.469971	3624.469971	0
2004-06-02	3641.629883	3673.709961	3636.310059	3646.229980	3646.229980	0
2004-06-03	3642.870117	3654.370117	3618.229980	3654.370117	3654.370117	0
2004-06-04	3665.000000	3704.639893	3654.600098	3698.870117	3698.870117	0
2004-06-07	3711.989990	3729.520020	3706.459961	3722.229980	3722.229980	0
2004-06-08	3738.110107	3738.120117	3711.510010	3723.459961	3723.459961	0
2004-06-09	3722.300049	3735.020020	3695.070068	3699.290039	3699.290039	0
2004-06-10	3691.919922	3716.770020	3691.919922	3711.379883	3711.379883	0
2004-06-11	3708.560059	3708.560059	3686.429932	3699.379883	3699.379883	0
2004-06-14	3689.399902	3695.989990	3636.760010	3647.100098	3647.100098	0
2004-06-15	3650.919922	3694.909912	3640.800049	3683.429932	3683.429932	0
2004-06-16	3695.040039	3720.250000	3692.600098	3714.500000	3714.500000	0
2004-06-17	3704.989990	3736.199951	3704.989990	3718.080078	3718.080078	0
2004-06-18	3709.199951	3744.169922	3699.989990	3740.899902	3740.899902	0
2004-06-21	3753.300049	3756.320068	3726.209961	3740.280029	3740.280029	0
2004-06-22	3731.689941	3732.479980	3693.800049	3700.320068	3700.320068	0
2004-06-23	3721.699951	3737.179932	3715.399902	3720.139893	3720.139893	0
2004-06-24	3752.550049	3768.050049	3740.560059	3755.750000	3755.750000	0
2004-06-25	3741.600098	3756.800049	3731.570068	3742.379883	3742.379883	0
2004-06-28	3739.149902	3778.760010	3732.689941	3771.580078	3771.580078	0
2004-06-29	3756.179932	3763.939941	3746.169922	3756.479980	3756.479980	0
2004-06-30	3763.060059	3770.530029	3732.989990	3732.989990	3732.989990	0
2004-07-01	3749.310059	3773.639893	3708.379883	3716.199951	3716.199951	0
2004-07-02	3708.250000	3717.830078	3673.330078	3685.060059	3685.060059	0
2004-07-05	3683.699951	3702.600098	3683.699951	3688.179932	3688.179932	0
2004-07-06	3682.810059	3689.949951	3650.520020	3660.679932	3660.679932	0
2004-07-07	3663.169922	3680.919922	3657.280029	3660.399902	3660.399902	0
2004-07-08	3651.080078	3670.409912	3627.959961	3670.409912	3670.409912	0
2004-07-09	3648.489990	3676.020020	3635.280029	3668.479980	3668.479980	0
2004-07-12	3650.860107	3680.830078	3644.850098	3651.629883	3651.629883	0
2004-07-13	3670.330078	3670.989990	3656.179932	3656.179932	3656.179932	0
2004-07-14	3636.770020	3651.489990	3617.419922	3648.750000	3648.750000	0
2004-07-15	3640.040039	3645.879883	3610.370117	3610.550049	3610.550049	0
2004-07-16	3611.610107	3637.320068	3607.899902	3610.399902	3610.399902	0
2004-07-19	3601.050049	3615.949951	3588.689941	3592.629883	3592.629883	0
2004-07-20	3586.840088	3610.080078	3564.250000	3607.389893	3607.389893	0
2004-07-21	3639.449951	3657.510010	3633.179932	3637.469971	3637.469971	0
2004-07-22	3596.729980	3599.250000	3568.590088	3572.840088	3572.840088	0
2004-07-23	3581.360107	3587.760010	3560.659912	3567.290039	3567.290039	0
2004-07-26	3568.330078	3582.010010	3530.959961	3532.610107	3532.610107	0
2004-07-27	3538.209961	3567.610107	3536.360107	3565.100098	3565.100098	0
2004-07-28	3589.969971	3602.659912	3564.620117	3575.919922	3575.919922	0
2004-07-29	3588.060059	3646.560059	3588.060059	3643.790039	3643.790039	0
2004-07-30	3638.100098	3662.060059	3620.979980	3647.100098	3647.100098	0
2004-08-02	3622.850098	3628.360107	3607.260010	3623.790039	3623.790039	0
2004-08-03	3637.280029	3655.110107	3626.520020	3650.800049	3650.800049	0
2004-08-04	3623.090088	3631.159912	3592.870117	3607.580078	3607.580078	0
2004-08-05	3624.820068	3652.600098	3622.979980	3622.979980	3622.979980	0
2004-08-06	3576.320068	3595.620117	3525.870117	3528.639893	3528.639893	0
2004-08-09	3529.340088	3532.389893	3482.030029	3497.300049	3497.300049	0
2004-08-10	3494.610107	3533.060059	3494.610107	3533.060059	3533.060059	0
2004-08-11	3539.530029	3542.350098	3477.139893	3502.949951	3502.949951	0
2004-08-12	3513.379883	3535.070068	3477.239990	3494.229980	3494.229980	0
2004-08-13	3467.020020	3495.919922	3460.899902	3484.840088	3484.840088	0
2004-08-16	3470.330078	3521.500000	3452.409912	3516.679932	3516.679932	0
2004-08-17	3512.739990	3553.770020	3507.159912	3533.129883	3533.129883	0
2004-08-18	3527.860107	3545.790039	3510.780029	3541.479980	3541.479980	0
2004-08-19	3557.310059	3572.149902	3534.469971	3544.419922	3544.419922	0
2004-08-20	3545.399902	3545.409912	3511.300049	3538.020020	3538.020020	0
2004-08-23	3567.090088	3595.520020	3555.270020	3589.689941	3589.689941	0
2004-08-24	3592.550049	3612.780029	3584.570068	3594.379883	3594.379883	0
2004-08-25	3607.120117	3612.030029	3586.159912	3595.260010	3595.260010	0
2004-08-26	3624.260010	3633.629883	3614.909912	3629.840088	3629.840088	0
2004-08-27	3635.159912	3649.239990	3622.729980	3649.239990	3649.239990	0
2004-08-30	3650.780029	3656.570068	3631.879883	3636.709961	3636.709961	0
2004-08-31	3621.139893	3630.850098	3583.739990	3594.280029	3594.280029	0
2004-09-01	3606.080078	3627.810059	3601.070068	3613.229980	3613.229980	0
2004-09-02	3610.689941	3640.820068	3601.379883	3633.379883	3633.379883	0
2004-09-03	3633.850098	3674.300049	3624.750000	3665.939941	3665.939941	0
2004-09-06	3671.270020	3681.840088	3664.290039	3673.030029	3673.030029	0
2004-09-07	3673.580078	3688.629883	3664.300049	3682.139893	3682.139893	0
2004-09-08	3682.260010	3686.129883	3670.850098	3677.550049	3677.550049	0
2004-09-09	3663.689941	3664.540039	3635.520020	3652.020020	3652.020020	0
2004-09-10	3656.770020	3683.719971	3655.979980	3677.610107	3677.610107	0
2004-09-13	3691.110107	3725.399902	3691.110107	3725.399902	3725.399902	0
2004-09-14	3716.600098	3716.719971	3699.090088	3708.030029	3708.030029	0
2004-09-15	3708.489990	3720.750000	3686.159912	3691.850098	3691.850098	0
2004-09-16	3692.590088	3703.840088	3677.479980	3691.679932	3691.679932	0
2004-09-17	3701.280029	3736.669922	3684.709961	3726.219971	3726.219971	0
2004-09-20	3716.699951	3719.879883	3685.270020	3703.689941	3703.689941	0
2004-09-21	3696.560059	3734.479980	3695.350098	3731.139893	3731.139893	0
2004-09-22	3723.459961	3740.510010	3690.120117	3692.110107	3692.110107	0
2004-09-23	3682.040039	3685.510010	3642.040039	3653.100098	3653.100098	0
2004-09-24	3648.770020	3676.199951	3644.909912	3673.510010	3673.510010	0
2004-09-27	3678.419922	3678.419922	3646.080078	3656.929932	3656.929932	0
2004-09-28	3647.020020	3682.570068	3643.510010	3667.469971	3667.469971	0
2004-09-29	3668.169922	3695.800049	3668.169922	3682.669922	3682.669922	0
2004-09-30	3700.729980	3709.250000	3634.070068	3640.610107	3640.610107	0
2004-10-01	3656.300049	3730.159912	3656.300049	3730.159912	3730.159912	0
2004-10-04	3749.050049	3779.330078	3749.050049	3767.060059	3767.060059	0
2004-10-05	3764.879883	3782.379883	3752.250000	3770.239990	3770.239990	0
2004-10-06	3771.300049	3778.679932	3750.110107	3764.590088	3764.590088	0
2004-10-07	3773.239990	3787.389893	3749.679932	3758.699951	3758.699951	0
2004-10-08	3741.459961	3771.280029	3717.020020	3737.870117	3737.870117	0
2004-10-11	3733.830078	3735.409912	3714.580078	3727.639893	3727.639893	70503600
2004-10-12	3719.709961	3719.860107	3671.280029	3689.850098	3689.850098	68239200
2004-10-13	3701.449951	3717.610107	3685.580078	3694.320068	3694.320068	104141400
2004-10-14	3675.229980	3685.419922	3662.870117	3664.949951	3664.949951	105502200
2004-10-15	3647.590088	3670.760010	3638.139893	3670.760010	3670.760010	66952800
2004-10-18	3679.770020	3683.500000	3653.169922	3659.810059	3659.810059	75542000
2004-10-19	3689.189941	3723.439941	3689.189941	3700.560059	3700.560059	111382200
2004-10-20	3662.949951	3673.669922	3650.620117	3665.679932	3665.679932	101065200
2004-10-21	3696.020020	3696.020020	3651.919922	3687.530029	3687.530029	138817000
2004-10-22	3689.050049	3712.169922	3679.149902	3687.169922	3687.169922	114767000
2004-10-25	3636.270020	3636.270020	3599.370117	3609.060059	3609.060059	96339600
2004-10-26	3612.389893	3623.300049	3600.750000	3619.479980	3619.479980	78482600
2004-10-27	3637.060059	3680.399902	3628.739990	3678.389893	3678.389893	103033600
2004-10-28	3699.899902	3724.090088	3699.010010	3721.820068	3721.820068	138210200
2004-10-29	3708.510010	3738.590088	3706.820068	3706.820068	3706.820068	95075800
2004-11-01	3697.939941	3741.540039	3697.939941	3734.070068	3734.070068	52807000
2004-11-02	3738.929932	3766.389893	3731.530029	3765.840088	3765.840088	86838400
2004-11-03	3790.199951	3798.199951	3765.209961	3769.929932	3769.929932	107265600
2004-11-04	3748.709961	3768.010010	3741.459961	3762.449951	3762.449951	94763400
2004-11-05	3796.189941	3811.600098	3776.010010	3780.989990	3780.989990	114898800
2004-11-08	3782.350098	3787.290039	3770.510010	3776.989990	3776.989990	68879000
2004-11-09	3784.159912	3785.739990	3767.120117	3769.939941	3769.939941	92008600
2004-11-10	3782.030029	3798.760010	3780.070068	3784.909912	3784.909912	93760000
2004-11-11	3780.120117	3839.500000	3776.540039	3833.790039	3833.790039	96375600
2004-11-12	3844.409912	3850.159912	3826.320068	3835.110107	3835.110107	107530000
2004-11-15	3848.090088	3856.010010	3820.560059	3820.969971	3820.969971	80823200
2004-11-16	3827.260010	3832.739990	3781.810059	3794.270020	3794.270020	89578600
2004-11-17	3801.500000	3844.139893	3793.979980	3844.139893	3844.139893	111938400
2004-11-18	3826.679932	3839.870117	3819.760010	3830.389893	3830.389893	120539000
2004-11-19	3837.919922	3844.379883	3792.949951	3798.780029	3798.780029	133205000
2004-11-22	3776.520020	3783.110107	3754.159912	3774.250000	3774.250000	89247000
2004-11-23	3795.179932	3807.379883	3772.979980	3780.090088	3780.090088	85151200
2004-11-24	3798.000000	3798.000000	3754.139893	3760.699951	3760.699951	76369200
2004-11-25	3771.360107	3802.850098	3769.429932	3797.590088	3797.590088	82699200
2004-11-26	3783.600098	3791.899902	3764.310059	3782.199951	3782.199951	57451200
2004-11-29	3787.090088	3824.600098	3780.610107	3780.610107	3780.610107	88352800
2004-11-30	3796.129883	3796.129883	3745.750000	3753.750000	3753.750000	95483600
2004-12-01	3751.739990	3805.850098	3744.360107	3796.709961	3796.709961	118995600
2004-12-02	3808.469971	3822.250000	3796.080078	3811.449951	3811.449951	107974800
2004-12-03	3812.419922	3824.469971	3771.610107	3783.510010	3783.510010	113365400
2004-12-06	3765.090088	3771.090088	3755.679932	3767.389893	3767.389893	59357600
2004-12-07	3770.570068	3800.489990	3763.080078	3787.449951	3787.449951	79917800
2004-12-08	3763.510010	3782.439941	3755.149902	3775.040039	3775.040039	82847800
2004-12-09	3760.340088	3786.000000	3735.550049	3747.459961	3747.459961	134875000
2004-12-10	3768.229980	3779.169922	3753.679932	3768.419922	3768.419922	101576800
2004-12-13	3777.070068	3813.689941	3775.000000	3805.939941	3805.939941	109091200
2004-12-14	3827.739990	3829.800049	3803.919922	3814.389893	3814.389893	113928600
2004-12-15	3821.750000	3825.729980	3802.060059	3802.989990	3802.989990	89783800
2004-12-16	3805.330078	3818.110107	3804.120117	3810.669922	3810.669922	96644200
2004-12-17	3812.489990	3814.770020	3742.939941	3744.919922	3744.919922	130248000
2004-12-20	3742.820068	3776.030029	3742.610107	3764.040039	3764.040039	77909000
2004-12-21	3758.530029	3773.439941	3755.550049	3770.030029	3770.030029	78762000
2004-12-22	3793.389893	3811.300049	3789.489990	3806.149902	3806.149902	78384200
2004-12-23	3800.429932	3822.010010	3799.959961	3819.679932	3819.679932	51450400
2004-12-24	3816.629883	3823.530029	3808.189941	3822.760010	3822.760010	9813800
2004-12-27	3812.679932	3833.629883	3812.020020	3817.689941	3817.689941	40370400
2004-12-28	3820.870117	3825.310059	3808.189941	3824.830078	3824.830078	30974000
2004-12-29	3832.209961	3838.179932	3818.209961	3827.159912	3827.159912	38843000
2004-12-30	3838.879883	3838.879883	3826.300049	3827.949951	3827.949951	27162600
2004-12-31	3820.870117	3821.159912	3801.780029	3821.159912	3821.159912	30699600
2005-01-03	3830.580078	3884.729980	3824.050049	3855.679932	3855.679932	66550800
2005-01-04	3848.260010	3874.469971	3845.030029	3863.300049	3863.300049	82249400
2005-01-05	3834.070068	3845.280029	3828.810059	3829.360107	3829.360107	86935200
2005-01-06	3831.840088	3864.360107	3831.050049	3856.479980	3856.479980	87290200
2005-01-07	3851.879883	3883.919922	3848.949951	3877.959961	3877.959961	104805600
2005-01-10	3890.389893	3890.389893	3860.149902	3877.820068	3877.820068	88395400
2005-01-11	3897.360107	3897.360107	3841.250000	3848.989990	3848.989990	118625400
2005-01-12	3852.260010	3856.699951	3804.919922	3816.139893	3816.139893	112647400
2005-01-13	3834.899902	3844.570068	3821.610107	3834.110107	3834.110107	93274800
2005-01-14	3821.620117	3861.959961	3820.929932	3854.600098	3854.600098	92154400
2005-01-17	3865.399902	3881.439941	3861.350098	3881.439941	3881.439941	57362200
2005-01-18	3875.159912	3877.540039	3847.320068	3875.020020	3875.020020	104871200
2005-01-19	3883.439941	3892.189941	3864.659912	3869.010010	3869.010010	94446200
2005-01-20	3847.320068	3852.629883	3834.110107	3842.439941	3842.439941	18674800
2005-01-21	3829.159912	3857.820068	3829.159912	3854.189941	3854.189941	76584200
2005-01-24	3840.570068	3854.439941	3819.949951	3848.709961	3848.709961	97262200
2005-01-25	3846.810059	3887.179932	3844.030029	3882.040039	3882.040039	95183400
2005-01-26	3885.719971	3892.350098	3877.570068	3879.820068	3879.820068	83481000
2005-01-27	3892.040039	3892.939941	3861.659912	3891.399902	3891.399902	99218600
2005-01-28	3897.570068	3899.419922	3868.879883	3870.350098	3870.350098	73269000
2005-01-31	3895.899902	3913.919922	3893.750000	3913.689941	3913.689941	86741600
2005-02-01	3914.209961	3939.179932	3908.800049	3939.179932	3939.179932	92981800
2005-02-02	3947.409912	3951.719971	3935.250000	3951.719971	3951.719971	94364600
2005-02-03	3946.020020	3953.580078	3921.229980	3928.939941	3928.939941	177341800
2005-02-04	3942.719971	3960.270020	3928.419922	3958.010010	3958.010010	109384200
2005-02-07	3968.969971	3982.669922	3968.250000	3981.899902	3981.899902	98357800
2005-02-08	3980.719971	3984.679932	3968.530029	3980.770020	3980.770020	94875600
2005-02-09	3986.689941	3991.090088	3955.669922	3969.620117	3969.620117	92926600
2005-02-10	3970.840088	3986.810059	3956.879883	3970.370117	3970.370117	89321600
2005-02-11	3978.300049	4016.750000	3978.300049	4016.750000	4016.750000	98484400
2005-02-14	4013.899902	4020.699951	3999.540039	4012.110107	4012.110107	65811000
2005-02-15	4009.820068	4034.010010	4003.560059	4030.449951	4030.449951	94342200
2005-02-16	4026.750000	4030.449951	3995.100098	4009.020020	4009.020020	97419400
2005-02-17	4011.040039	4024.649902	4004.199951	4005.500000	4005.500000	98172800
2005-02-18	4000.870117	4042.270020	3999.899902	4029.020020	4029.020020	122097400
2005-02-21	4034.189941	4040.379883	4008.649902	4022.620117	4022.620117	43957000
2005-02-22	4019.879883	4024.679932	3980.550049	4002.330078	4002.330078	121333400
2005-02-23	3974.939941	3978.659912	3951.600098	3977.189941	3977.189941	128996000
2005-02-24	3983.590088	3985.790039	3969.030029	3977.669922	3977.669922	103234000
2005-02-25	4000.030029	4034.570068	4000.030029	4034.570068	4034.570068	92054600
2005-02-28	4043.729980	4056.689941	4027.159912	4027.159912	4027.159912	95381800
2005-03-01	4025.840088	4067.090088	4023.610107	4054.979980	4054.979980	106744600
2005-03-02	4060.469971	4062.719971	4032.989990	4062.719971	4062.719971	95200200
2005-03-03	4051.419922	4073.679932	4050.020020	4061.350098	4061.350098	89077200
2005-03-04	4080.149902	4091.580078	4059.449951	4091.580078	4091.580078	83639200
2005-03-07	4094.370117	4108.000000	4090.040039	4108.000000	4108.000000	82058800
2005-03-08	4098.379883	4103.649902	4079.280029	4085.379883	4085.379883	93750000
2005-03-09	4091.679932	4104.740234	4062.860107	4066.689941	4066.689941	117384800
2005-03-10	4048.399902	4057.600098	4033.699951	4038.209961	4038.209961	106226000
2005-03-11	4063.449951	4067.159912	4047.689941	4049.179932	4049.179932	76646000
2005-03-14	4046.419922	4055.770020	4035.780029	4048.550049	4048.550049	68102600
2005-03-15	4060.469971	4083.409912	4059.770020	4077.739990	4077.739990	87381400
2005-03-16	4064.179932	4074.510010	4019.399902	4019.399902	4019.399902	111597000
2005-03-17	4020.590088	4036.169922	4011.209961	4032.070068	4032.070068	82862600
2005-03-18	4040.090088	4060.780029	4034.939941	4050.770020	4050.770020	95522000
2005-03-21	4045.969971	4059.790039	4032.189941	4033.000000	4033.000000	37594600
2005-03-22	4036.260010	4051.800049	4010.669922	4047.179932	4047.179932	90484200
2005-03-23	4009.219971	4036.699951	4009.010010	4032.409912	4032.409912	87517400
2005-03-24	4042.239990	4080.899902	4036.300049	4078.310059	4078.310059	81262600
2005-03-25	null	null	null	null	null	null
2005-03-28	null	null	null	null	null	null
2005-03-29	4056.429932	4082.189941	4043.899902	4081.649902	4081.649902	85357800
2005-03-30	4060.149902	4074.010010	4053.649902	4064.610107	4064.610107	87659800
2005-03-31	4091.459961	4097.069824	4064.610107	4067.780029	4067.780029	92737400
2005-04-01	4068.000000	4097.049805	4062.229980	4080.080078	4080.080078	83515600
2005-04-04	4067.810059	4067.810059	4029.949951	4052.320068	4052.320068	80235200
2005-04-05	4074.889893	4090.629883	4069.550049	4087.939941	4087.939941	106211000
2005-04-06	4094.139893	4108.509766	4093.060059	4106.990234	4106.990234	109172400
2005-04-07	4111.509766	4130.930176	4099.910156	4124.370117	4124.370117	111063000
2005-04-08	4134.319824	4143.930176	4122.609863	4124.290039	4124.290039	87803600
2005-04-11	4107.000000	4123.879883	4102.000000	4117.620117	4117.620117	83466000
2005-04-12	4112.709961	4116.319824	4089.169922	4096.810059	4096.810059	85840200
2005-04-13	4122.970215	4126.520020	4114.270020	4116.850098	4116.850098	92884400
2005-04-14	4100.629883	4126.140137	4097.870117	4111.109863	4111.109863	94288600
2005-04-15	4083.949951	4084.909912	4032.280029	4032.280029	4032.280029	139406400
2005-04-18	3975.250000	3975.250000	3930.629883	3949.590088	3949.590088	158371400
2005-04-19	3971.729980	3973.639893	3954.419922	3962.389893	3962.389893	102136200
2005-04-20	3979.750000	3983.540039	3944.310059	3950.020020	3950.020020	104986600
2005-04-21	3933.229980	3972.570068	3933.229980	3951.020020	3951.020020	109772200
2005-04-22	3977.750000	3985.800049	3967.790039	3980.179932	3980.179932	82783200
2005-04-25	3973.750000	3997.050049	3966.100098	3993.070068	3993.070068	73739400
2005-04-26	3997.889893	4000.120117	3970.729980	3993.040039	3993.040039	72852000
2005-04-27	3960.040039	3978.060059	3917.280029	3927.679932	3927.679932	132260600
2005-04-28	3940.159912	3950.600098	3895.419922	3911.449951	3911.449951	148216800
2005-04-29	3882.419922	3930.590088	3882.419922	3911.709961	3911.709961	106678200
2005-05-02	3928.709961	3945.060059	3920.879883	3938.770020	3938.770020	50948600
2005-05-03	3953.250000	3956.580078	3934.719971	3955.929932	3955.929932	78560000
2005-05-04	3968.030029	3987.629883	3950.540039	3987.629883	3987.629883	90894800
2005-05-05	3995.199951	4025.969971	3995.199951	4019.350098	4019.350098	62031400
2005-05-06	4020.000000	4041.169922	4004.270020	4033.459961	4033.459961	71962200
2005-05-09	4028.510010	4033.370117	4011.459961	4020.189941	4020.189941	73316000
2005-05-10	4021.250000	4035.649902	3990.580078	4000.250000	4000.250000	81995400
2005-05-11	3977.989990	4009.379883	3977.110107	3979.530029	3979.530029	92289000
2005-05-12	4010.699951	4022.850098	4004.429932	4015.649902	4015.649902	98640200
2005-05-13	3996.979980	4017.889893	3990.479980	4017.889893	4017.889893	96173800
2005-05-16	3990.459961	4015.399902	3990.459961	4010.979980	4010.979980	68528800
2005-05-17	4022.510010	4022.510010	3994.790039	4006.189941	4006.189941	90808200
2005-05-18	4016.149902	4073.149902	4016.149902	4073.149902	4073.149902	119027800
2005-05-19	4076.639893	4091.820068	4074.649902	4085.979980	4085.979980	91351600
2005-05-20	4088.030029	4112.060059	4080.439941	4096.180176	4096.180176	84027800
2005-05-23	4113.330078	4123.939941	4100.959961	4118.370117	4118.370117	71638200
2005-05-24	4110.089844	4112.060059	4083.530029	4102.060059	4102.060059	74833600
2005-05-25	4097.410156	4114.750000	4092.320068	4100.270020	4100.270020	76354200
2005-05-26	4101.140137	4140.479980	4101.020020	4137.279785	4137.279785	159530800
2005-05-27	4139.750000	4142.540039	4117.529785	4131.830078	4131.830078	83840000
2005-05-30	4108.950195	4135.310059	4097.959961	4134.870117	4134.870117	41857400
2005-05-31	4134.959961	4139.069824	4120.689941	4120.729980	4120.729980	105524200
2005-06-01	4125.850098	4178.250000	4123.770020	4178.250000	4178.250000	96064600
2005-06-02	4180.229980	4198.200195	4163.640137	4183.720215	4183.720215	97875000
2005-06-03	4184.149902	4191.500000	4157.930176	4162.470215	4162.470215	78954200
2005-06-06	4159.870117	4167.459961	4139.419922	4146.470215	4146.470215	93296200
2005-06-07	4153.939941	4184.970215	4150.279785	4180.740234	4180.740234	106110600
2005-06-08	4167.479980	4179.879883	4161.649902	4171.350098	4171.350098	99126600
2005-06-09	4163.979980	4164.330078	4140.879883	4153.709961	4153.709961	90292200
2005-06-10	4175.390137	4195.100098	4172.209961	4184.100098	4184.100098	90318400
2005-06-13	4192.649902	4205.720215	4179.740234	4203.490234	4203.490234	76748400
2005-06-14	4195.520020	4202.669922	4187.129883	4197.740234	4197.740234	103725200
2005-06-15	4205.290039	4216.459961	4180.009766	4184.359863	4184.359863	115436400
2005-06-16	4203.569824	4209.220215	4184.959961	4185.149902	4185.149902	113268800
2005-06-17	4193.060059	4246.430176	4192.580078	4220.910156	4220.910156	137731400
2005-06-20	4213.399902	4213.709961	4182.669922	4193.399902	4193.399902	97438600
2005-06-21	4206.020020	4224.970215	4205.470215	4222.020020	4222.020020	84119200
2005-06-22	4224.120117	4242.529785	4220.930176	4229.549805	4229.549805	98593800
2005-06-23	4236.330078	4244.839844	4217.020020	4240.180176	4240.180176	90600000
2005-06-24	4208.149902	4212.069824	4192.220215	4199.870117	4199.870117	87190200
2005-06-27	4172.959961	4178.220215	4149.950195	4157.680176	4157.680176	84544400
2005-06-28	4167.560059	4195.729980	4165.189941	4194.330078	4194.330078	79907000
2005-06-29	4211.779785	4245.359863	4207.359863	4231.879883	4231.879883	134670800
2005-06-30	4225.540039	4254.799805	4223.680176	4229.350098	4229.350098	124613600
2005-07-01	4224.660156	4269.620117	4220.750000	4269.620117	4269.620117	80595600
2005-07-04	4276.709961	4276.709961	4258.560059	4264.600098	4264.600098	50538200
2005-07-05	4264.000000	4265.250000	4231.930176	4252.750000	4252.750000	80083600
2005-07-06	4272.640137	4292.069824	4264.000000	4279.950195	4279.950195	93075800
2005-07-07	4269.560059	4269.770020	4089.270020	4220.620117	4220.620117	231771800
2005-07-08	4264.709961	4300.310059	4252.069824	4300.310059	4300.310059	108540400
2005-07-11	4317.899902	4332.990234	4313.990234	4321.560059	4321.560059	92375400
2005-07-12	4319.859863	4330.520020	4293.669922	4313.779785	4313.779785	139141400
2005-07-13	4318.060059	4346.109863	4316.149902	4343.620117	4343.620117	99903800
2005-07-14	4352.080078	4389.490234	4348.450195	4370.879883	4370.879883	107318200
2005-07-15	4369.959961	4383.939941	4361.770020	4373.770020	4373.770020	83235800
2005-07-18	4381.189941	4388.700195	4357.500000	4363.470215	4363.470215	67006800
2005-07-19	4367.250000	4424.250000	4367.250000	4424.250000	4424.250000	158013400
2005-07-20	4421.209961	4435.290039	4402.160156	4418.390137	4418.390137	103324000
2005-07-21	4435.200195	4465.899902	4403.569824	4425.660156	4425.660156	143517800
2005-07-22	4420.390137	4434.109863	4396.620117	4415.520020	4415.520020	92680600
2005-07-25	4423.229980	4431.649902	4403.020020	4422.120117	4422.120117	69305600
2005-07-26	4424.189941	4445.149902	4414.589844	4420.779785	4420.779785	84388400
2005-07-27	4435.729980	4449.350098	4428.660156	4433.129883	4433.129883	101226000
2005-07-28	4455.779785	4472.169922	4451.319824	4462.259766	4462.259766	136038400
2005-07-29	4473.310059	4483.470215	4440.319824	4451.740234	4451.740234	109594600
2005-08-01	4457.490234	4478.720215	4448.240234	4456.870117	4456.870117	65496000
2005-08-02	4459.890137	4503.330078	4457.220215	4503.330078	4503.330078	76689000
2005-08-03	4501.049805	4503.740234	4474.660156	4495.479980	4495.479980	93522800
2005-08-04	4471.540039	4485.509766	4444.629883	4458.970215	4458.970215	91857400
2005-08-05	4438.490234	4466.970215	4421.700195	4421.700195	4421.700195	88897200
2005-08-08	4437.149902	4462.009766	4433.020020	4441.009766	4441.009766	55411000
2005-08-09	4445.750000	4491.689941	4437.020020	4491.689941	4491.689941	94419600
2005-08-10	4501.700195	4527.109863	4501.700195	4527.109863	4527.109863	103305400
2005-08-11	4513.129883	4522.899902	4489.660156	4509.100098	4509.100098	79641800
2005-08-12	4496.390137	4510.399902	4467.600098	4476.479980	4476.479980	27749000
2005-08-15	4470.410156	4485.629883	4462.549805	4466.580078	4466.580078	33175200
2005-08-16	4483.859863	4490.529785	4441.549805	4444.569824	4444.569824	71305800
2005-08-17	4433.850098	4443.270020	4410.459961	4439.629883	4439.629883	69850400
2005-08-18	4436.620117	4441.850098	4406.020020	4430.069824	4430.069824	63927000
2005-08-19	4433.560059	4489.359863	4431.270020	4487.899902	4487.899902	72246800
2005-08-22	4490.140137	4498.040039	4478.609863	4485.939941	4485.939941	48707000
2005-08-23	4471.870117	4472.459961	4436.560059	4436.560059	4436.560059	65161800
2005-08-24	4428.160156	4431.700195	4401.200195	4424.430176	4424.430176	91589000
2005-08-25	4396.709961	4396.709961	4369.209961	4378.509766	4378.509766	86899600
2005-08-26	4380.140137	4392.750000	4342.700195	4342.700195	4342.700195	73533400
2005-08-29	4319.930176	4364.240234	4313.339844	4361.270020	4361.270020	51477200
2005-08-30	4373.600098	4381.680176	4356.660156	4356.660156	4356.660156	70991600
2005-08-31	4356.720215	4400.000000	4356.720215	4399.359863	4399.359863	129913400
2005-09-01	4423.700195	4437.859863	4407.640137	4424.149902	4424.149902	105772800
2005-09-02	4414.250000	4432.600098	4392.740234	4404.950195	4404.950195	94891000
2005-09-05	4404.810059	4431.629883	4404.810059	4430.089844	4430.089844	57403000
2005-09-06	4437.709961	4472.549805	4433.729980	4472.549805	4472.549805	102022400
2005-09-07	4489.830078	4498.439941	4476.049805	4486.189941	4486.189941	121019200
2005-09-08	4478.169922	4485.850098	4453.399902	4465.939941	4465.939941	103737600
2005-09-09	4473.399902	4495.250000	4473.399902	4491.680176	4491.680176	88044800
2005-09-12	4504.859863	4517.620117	4489.709961	4491.819824	4491.819824	97723200
2005-09-13	4493.180176	4498.459961	4453.410156	4453.410156	4453.410156	126202800
2005-09-14	4460.169922	4478.770020	4454.339844	4470.430176	4470.430176	100251800
2005-09-15	4461.330078	4495.200195	4459.270020	4479.390137	4479.390137	87647200
2005-09-16	4479.330078	4526.930176	4476.270020	4509.490234	4509.490234	127334400
2005-09-19	4486.209961	4522.959961	4463.060059	4505.680176	4505.680176	82714600
2005-09-20	4516.180176	4536.990234	4514.830078	4531.799805	4531.799805	106255200
2005-09-21	4497.930176	4514.490234	4466.229980	4468.060059	4468.060059	128982400
2005-09-22	4454.770020	4462.580078	4424.200195	4448.149902	4448.149902	125026000
2005-09-23	4458.819824	4477.200195	4452.419922	4477.200195	4477.200195	89484800
2005-09-26	4510.399902	4566.919922	4510.399902	4566.919922	4566.919922	127857200
2005-09-27	4556.049805	4562.540039	4537.310059	4546.799805	4546.799805	89496400
2005-09-28	4563.399902	4602.419922	4563.399902	4599.629883	4599.629883	114690000
2005-09-29	4598.729980	4607.430176	4576.020020	4578.859863	4578.859863	82104800
2005-09-30	4618.899902	4620.850098	4586.029785	4600.020020	4600.020020	86857400
2005-10-03	4610.009766	4631.589844	4608.100098	4622.540039	4622.540039	83428000
2005-10-04	4624.439941	4651.109863	4606.839844	4650.240234	4650.240234	101656800
2005-10-05	4619.399902	4625.250000	4594.109863	4594.109863	4594.109863	110477600
2005-10-06	4546.290039	4552.069824	4519.649902	4536.899902	4536.899902	140562400
2005-10-07	4521.430176	4551.689941	4514.740234	4528.790039	4528.790039	98729800
2005-10-10	4544.049805	4561.520020	4528.899902	4536.220215	4536.220215	76356600
2005-10-11	4536.089844	4570.490234	4535.919922	4549.680176	4549.680176	91379200
2005-10-12	4530.189941	4543.959961	4509.629883	4515.049805	4515.049805	91378000
2005-10-13	4500.729980	4513.310059	4452.200195	4470.129883	4470.129883	114052200
2005-10-14	4456.490234	4500.060059	4445.830078	4482.129883	4482.129883	112384200
2005-10-17	4498.509766	4507.350098	4485.140137	4489.209961	4489.209961	76914400
2005-10-18	4494.990234	4502.009766	4452.899902	4461.140137	4461.140137	100485400
2005-10-19	4418.370117	4431.040039	4373.049805	4375.089844	4375.089844	145778400
2005-10-20	4436.540039	4445.319824	4383.750000	4390.660156	4390.660156	109005800
2005-10-21	4354.390137	4391.209961	4354.390137	4366.520020	4366.520020	100084400
2005-10-24	4371.950195	4421.970215	4362.740234	4421.970215	4421.970215	77048400
2005-10-25	4440.720215	4441.750000	4396.990234	4396.990234	4396.990234	96021400
2005-10-26	4400.819824	4433.479980	4392.600098	4412.700195	4412.700195	93332400
2005-10-27	4375.750000	4383.529785	4329.459961	4336.410156	4336.410156	170940600
2005-10-28	4320.299805	4348.200195	4288.149902	4326.709961	4326.709961	126063400
2005-10-31	4373.040039	4436.450195	4373.040039	4436.450195	4436.450195	102236200
2005-11-01	4432.910156	4450.120117	4421.750000	4434.750000	4434.750000	83767600
2005-11-02	4424.080078	4449.120117	4398.640137	4429.649902	4429.649902	101281400
2005-11-03	4454.569824	4502.620117	4449.029785	4502.020020	4502.020020	121381200
2005-11-04	4497.270020	4506.270020	4476.419922	4498.700195	4498.700195	100185200
2005-11-07	4493.310059	4516.729980	4475.689941	4503.649902	4503.649902	75922200
2005-11-08	4521.419922	4532.640137	4493.680176	4503.620117	4503.620117	123848400
2005-11-09	4509.100098	4511.950195	4476.580078	4480.229980	4480.229980	101791600
2005-11-10	4496.350098	4506.660156	4474.229980	4479.500000	4479.500000	94973400
2005-11-11	4526.270020	4541.819824	4513.750000	4536.490234	4536.490234	83912000
2005-11-14	4530.080078	4563.799805	4521.390137	4548.450195	4548.450195	78207800
2005-11-15	4545.959961	4557.209961	4527.189941	4543.149902	4543.149902	126286400
2005-11-16	4531.299805	4534.910156	4494.529785	4512.129883	4512.129883	100453800
2005-11-17	4522.870117	4543.859863	4514.560059	4523.180176	4523.180176	97487400
2005-11-18	4555.979980	4577.290039	4543.290039	4556.229980	4556.229980	118890600
2005-11-21	4563.049805	4593.640137	4556.240234	4586.379883	4586.379883	94556400
2005-11-22	4593.080078	4593.180176	4574.109863	4580.810059	4580.810059	81442200
2005-11-23	4611.129883	4611.129883	4588.810059	4608.649902	4608.649902	101878400
2005-11-24	4598.279785	4606.600098	4574.359863	4586.839844	4586.839844	77033000
2005-11-25	4592.290039	4601.709961	4580.520020	4600.479980	4600.479980	59607400
2005-11-28	4621.609863	4633.439941	4575.120117	4575.310059	4575.310059	131945600
2005-11-29	4568.339844	4606.000000	4556.779785	4588.729980	4588.729980	81157600
2005-11-30	4575.890137	4584.680176	4551.279785	4567.410156	4567.410156	128226400
2005-12-01	4581.729980	4636.459961	4580.180176	4636.459961	4636.459961	105595800
2005-12-02	4651.160156	4662.500000	4637.100098	4662.500000	4662.500000	78581400
2005-12-05	4660.009766	4666.100098	4636.810059	4650.540039	4650.540039	88238600
2005-12-06	4654.500000	4681.410156	4648.770020	4677.200195	4677.200195	88325400
2005-12-07	4676.600098	4690.750000	4651.430176	4660.580078	4660.580078	96236200
2005-12-08	4635.950195	4669.930176	4623.229980	4669.930176	4669.930176	89274000
2005-12-09	4659.709961	4668.279785	4647.629883	4661.009766	4661.009766	69864400
2005-12-12	4674.040039	4698.450195	4661.220215	4673.129883	4673.129883	105881200
2005-12-13	4673.069824	4701.850098	4666.879883	4693.399902	4693.399902	93445800
2005-12-14	4698.990234	4706.500000	4672.870117	4674.850098	4674.850098	102990200
2005-12-15	4683.560059	4684.750000	4657.720215	4673.140137	4673.140137	105790200
2005-12-16	4670.740234	4724.089844	4670.740234	4704.410156	4704.410156	162686200
2005-12-19	4705.620117	4712.870117	4691.290039	4694.859863	4694.859863	88295600
2005-12-20	4676.209961	4709.839844	4674.180176	4703.479980	4703.479980	109042200
2005-12-21	4706.850098	4752.410156	4706.850098	4752.410156	4752.410156	102003600
2005-12-22	4745.549805	4766.089844	4742.669922	4751.959961	4751.959961	73510000
2005-12-23	4758.759766	4768.939941	4746.600098	4757.740234	4757.740234	47427000
2005-12-26	null	null	null	null	null	null
2005-12-27	4751.149902	4780.049805	4751.149902	4769.379883	4769.379883	34610400
2005-12-28	4757.509766	4771.970215	4749.049805	4756.930176	4756.930176	40220400
2005-12-29	4762.310059	4776.529785	4760.680176	4772.930176	4772.930176	40116000
2005-12-30	4761.609863	4761.609863	4703.339844	4715.229980	4715.229980	45054600
2006-01-02	4731.919922	4757.540039	4727.089844	4754.919922	4754.919922	35923200
2006-01-03	4761.950195	4803.229980	4755.720215	4776.979980	4776.979980	93725400
2006-01-04	4820.899902	4838.520020	4799.189941	4838.520020	4838.520020	112403400
2006-01-05	4839.089844	4849.669922	4826.310059	4835.089844	4835.089844	107184400
2006-01-06	4843.160156	4867.149902	4839.750000	4867.149902	4867.149902	111654200
2006-01-09	4875.120117	4886.189941	4870.930176	4875.089844	4875.089844	116841600
2006-01-10	4868.899902	4868.899902	4838.479980	4861.930176	4861.930176	114865800
2006-01-11	4893.750000	4897.580078	4866.759766	4890.490234	4890.490234	102499000
2006-01-12	4875.879883	4898.049805	4872.520020	4890.240234	4890.240234	182529200
2006-01-13	4876.410156	4876.410156	4834.240234	4850.529785	4850.529785	133881600
2006-01-16	4844.129883	4864.759766	4844.129883	4856.089844	4856.089844	71310200
2006-01-17	4829.330078	4829.330078	4803.439941	4807.140137	4807.140137	112012800
2006-01-18	4748.720215	4792.069824	4730.379883	4772.089844	4772.089844	157454000
2006-01-19	4798.330078	4815.810059	4790.770020	4814.089844	4814.089844	111811800
2006-01-20	4828.709961	4841.419922	4773.479980	4773.479980	4773.479980	117347000
2006-01-23	4725.000000	4754.779785	4719.330078	4751.990234	4751.990234	114812800
2006-01-24	4758.930176	4766.520020	4739.759766	4748.319824	4748.319824	109663000
2006-01-25	4766.609863	4794.220215	4758.060059	4791.000000	4791.000000	121893200
2006-01-26	4801.839844	4876.520020	4800.209961	4876.520020	4876.520020	147786800
2006-01-27	4938.770020	4956.600098	4907.479980	4956.600098	4956.600098	198721400
2006-01-30	4945.830078	4954.959961	4934.620117	4936.790039	4936.790039	117194200
2006-01-31	4943.459961	4970.209961	4930.180176	4947.990234	4947.990234	121921600
2006-02-01	4946.770020	5000.000000	4936.589844	4999.390137	4999.390137	126147600
2006-02-02	5000.950195	5012.379883	4927.890137	4927.890137	4927.890137	176052600
2006-02-03	4945.379883	4955.939941	4905.629883	4937.560059	4937.560059	127846800
2006-02-06	4949.839844	4960.669922	4919.899902	4934.589844	4934.589844	108205800
2006-02-07	4951.990234	4958.509766	4906.359863	4935.399902	4935.399902	135639800
2006-02-08	4893.149902	4909.680176	4875.799805	4895.080078	4895.080078	125630000
2006-02-09	4925.709961	4958.790039	4921.600098	4955.740234	4955.740234	117139800
2006-02-10	4940.049805	4963.689941	4910.819824	4910.819824	4910.819824	98773200
2006-02-13	4916.359863	4957.359863	4898.959961	4957.359863	4957.359863	104654800
2006-02-14	4964.569824	4975.410156	4928.109863	4961.339844	4961.339844	129663600
2006-02-15	4957.120117	4958.310059	4922.810059	4934.089844	4934.089844	113479000
2006-02-16	4959.700195	4973.890137	4938.370117	4973.089844	4973.089844	97543400
2006-02-17	4975.729980	5003.390137	4965.569824	5000.000000	5000.000000	98496400
2006-02-20	4981.310059	4985.660156	4971.250000	4979.939941	4979.939941	60892200
2006-02-21	4997.939941	5024.509766	4974.509766	4991.930176	4991.930176	124168600
2006-02-22	4984.970215	5041.600098	4984.120117	5041.600098	5041.600098	120587600
2006-02-23	5051.770020	5060.270020	5020.040039	5040.390137	5040.390137	147666000
2006-02-24	5051.629883	5073.950195	5036.169922	5073.950195	5073.950195	103085800
2006-02-27	5082.129883	5085.200195	5058.089844	5080.520020	5080.520020	140426000
2006-02-28	5084.620117	5084.620117	4998.129883	5000.450195	5000.450195	152498600
2006-03-01	5008.709961	5059.029785	5006.000000	5057.609863	5057.609863	132999600
2006-03-02	5069.759766	5077.580078	4990.479980	5009.089844	5009.089844	139673600
2006-03-03	5012.939941	5030.359863	4966.709961	4989.149902	4989.149902	133234400
2006-03-06	5025.720215	5037.049805	5010.720215	5010.720215	5010.720215	129514800
2006-03-07	4989.930176	4996.689941	4968.720215	4992.209961	4992.209961	123852400
2006-03-08	5000.990234	5005.879883	4927.589844	4969.509766	4969.509766	149103600
2006-03-09	5007.959961	5012.419922	4981.049805	5007.839844	5007.839844	133724400
2006-03-10	4993.910156	5069.270020	4986.919922	5069.270020	5069.270020	117575400
2006-03-13	5094.229980	5112.700195	5085.740234	5107.470215	5107.470215	99056200
2006-03-14	5095.240234	5117.160156	5088.120117	5117.160156	5117.160156	109949800
2006-03-15	5131.040039	5141.549805	5119.609863	5127.930176	5127.930176	121084200
2006-03-16	5130.540039	5136.640137	5105.620117	5126.009766	5126.009766	110239600
2006-03-17	5133.089844	5171.379883	5124.750000	5141.080078	5141.080078	165232800
2006-03-20	5161.209961	5174.140137	5131.310059	5138.509766	5138.509766	96421400
2006-03-21	5136.919922	5148.560059	5098.379883	5148.560059	5148.560059	119449400
2006-03-22	5142.470215	5201.279785	5132.950195	5194.779785	5194.779785	181240200
2006-03-23	5204.680176	5205.609863	5179.660156	5194.779785	5194.779785	132081000
2006-03-24	5198.270020	5226.370117	5194.200195	5218.709961	5218.709961	152767600
2006-03-27	5212.390137	5218.850098	5162.069824	5162.439941	5162.439941	93518000
2006-03-28	5170.970215	5189.939941	5134.339844	5149.990234	5149.990234	104814800
2006-03-29	5144.120117	5189.620117	5143.660156	5180.250000	5180.250000	85148600
2006-03-30	5204.910156	5246.740234	5203.359863	5240.100098	5240.100098	117118000
2006-03-31	5227.049805	5247.310059	5211.069824	5220.850098	5220.850098	105696600
2006-04-03	5251.560059	5258.509766	5231.100098	5255.259766	5255.259766	124339800
2006-04-04	5241.709961	5241.709961	5203.910156	5205.810059	5205.810059	116863600
2006-04-05	5214.439941	5230.870117	5187.330078	5221.029785	5221.029785	120031200
2006-04-06	5232.410156	5245.560059	5200.459961	5222.359863	5222.359863	116226200
2006-04-07	5221.839844	5241.000000	5174.959961	5174.959961	5174.959961	114764800
2006-04-10	5170.049805	5190.870117	5155.830078	5190.270020	5190.270020	84382800
2006-04-11	5189.189941	5197.410156	5106.180176	5112.600098	5112.600098	126835600
2006-04-12	5106.479980	5110.799805	5058.350098	5085.109863	5085.109863	121817000
2006-04-13	5097.779785	5109.609863	5069.470215	5102.620117	5102.620117	82467200
2006-04-18	5097.560059	5101.930176	5073.509766	5095.970215	5095.970215	82229400
2006-04-19	5150.390137	5172.589844	5125.569824	5158.140137	5158.140137	108721800
2006-04-20	5158.240234	5227.129883	5158.240234	5206.790039	5206.790039	121195000
2006-04-21	5223.830078	5252.379883	5221.560059	5252.379883	5252.379883	109810200
2006-04-24	5227.700195	5239.379883	5219.270020	5221.439941	5221.439941	87307000
2006-04-25	5238.640137	5255.149902	5227.939941	5235.339844	5235.339844	103482600
2006-04-26	5244.470215	5261.600098	5241.990234	5252.319824	5252.319824	104366800
2006-04-27	5257.759766	5257.759766	5169.979980	5213.549805	5213.549805	169400000
2006-04-28	5211.140137	5219.069824	5184.270020	5188.399902	5188.399902	116765400
2006-05-02	5187.339844	5249.470215	5185.680176	5241.189941	5241.189941	116350600
2006-05-03	5260.569824	5267.509766	5193.939941	5193.939941	5193.939941	134590000
2006-05-04	5198.120117	5241.490234	5187.720215	5233.700195	5233.700195	98354400
2006-05-05	5244.209961	5287.240234	5237.520020	5286.399902	5286.399902	105246600
2006-05-08	5297.500000	5315.029785	5277.310059	5282.399902	5282.399902	85185000
2006-05-09	5292.290039	5312.180176	5272.819824	5312.180176	5312.180176	111713600
2006-05-10	5285.149902	5310.649902	5276.459961	5278.270020	5278.270020	126916200
2006-05-11	5284.060059	5329.160156	5259.120117	5262.939941	5262.939941	170039800
2006-05-12	5226.810059	5238.399902	5150.450195	5150.450195	5150.450195	212419200
2006-05-15	5130.529785	5137.430176	5052.799805	5064.850098	5064.850098	187040400
2006-05-16	5065.490234	5100.709961	5042.220215	5081.689941	5081.689941	150327200
2006-05-17	5103.580078	5110.200195	4920.310059	4920.310059	4920.310059	181139600
2006-05-18	4922.310059	4959.810059	4841.770020	4908.689941	4908.689941	199366800
2006-05-19	4933.729980	4964.839844	4906.740234	4944.569824	4944.569824	179287000
2006-05-22	4934.109863	4934.109863	4798.810059	4813.500000	4813.500000	183981800
2006-05-23	4847.520020	4963.100098	4847.520020	4931.529785	4931.529785	196174800
2006-05-24	4892.709961	4908.770020	4822.600098	4870.020020	4870.020020	150904800
2006-05-25	4878.509766	4949.529785	4840.580078	4949.529785	4949.529785	97131200
2006-05-26	4993.009766	5045.089844	4970.080078	5045.089844	5045.089844	162757400
2006-05-29	5022.859863	5026.359863	5009.169922	5015.319824	5015.319824	48836600
2006-05-30	5010.350098	5023.410156	4882.720215	4893.870117	4893.870117	151443400
2006-05-31	4834.560059	4937.910156	4820.060059	4930.180176	4930.180176	169673200
2006-06-01	4927.129883	4954.459961	4885.339844	4947.290039	4947.290039	123124000
2006-06-02	5000.450195	5023.169922	4937.810059	4959.700195	4959.700195	127736600
2006-06-05	4960.160156	4970.509766	4906.459961	4916.040039	4916.040039	73527800
2006-06-06	4834.439941	4857.390137	4786.430176	4797.919922	4797.919922	142432200
2006-06-07	4820.290039	4832.500000	4767.319824	4824.770020	4824.770020	138972600
2006-06-08	4706.390137	4762.740234	4684.339844	4684.339844	4684.339844	212133400
2006-06-09	4757.549805	4785.589844	4736.490234	4768.180176	4768.180176	135748800
2006-06-12	4757.560059	4780.080078	4720.160156	4723.180176	4723.180176	99536600
2006-06-13	4635.299805	4660.339844	4594.339844	4617.589844	4617.589844	176945000
2006-06-14	4622.220215	4642.149902	4564.689941	4615.439941	4615.439941	236820000
2006-06-15	4639.399902	4729.799805	4639.399902	4724.580078	4724.580078	174063400
2006-06-16	4789.939941	4801.629883	4681.470215	4694.890137	4694.890137	286744800
2006-06-19	4722.620117	4773.540039	4718.720215	4729.020020	4729.020020	123956200
2006-06-20	4687.390137	4770.419922	4678.370117	4770.419922	4770.419922	129009400
2006-06-21	4780.450195	4785.859863	4711.169922	4774.729980	4774.729980	130401600
2006-06-22	4828.629883	4838.540039	4775.589844	4803.290039	4803.290039	108699800
2006-06-23	4812.799805	4834.200195	4788.799805	4817.629883	4817.629883	98519600
2006-06-26	4838.720215	4842.799805	4796.149902	4801.490234	4801.490234	114452400
2006-06-27	4829.160156	4832.160156	4762.819824	4771.240234	4771.240234	111293500
2006-06-28	4751.790039	4802.609863	4744.580078	4774.000000	4774.000000	110729100
2006-06-29	4814.910156	4880.379883	4800.490234	4880.379883	4880.379883	119663300
2006-06-30	4946.589844	4974.529785	4914.250000	4965.959961	4965.959961	136360100
2006-07-03	4967.069824	4982.839844	4952.160156	4980.620117	4980.620117	102830500
2006-07-04	4985.839844	4985.839844	4948.410156	4983.879883	4983.879883	57923600
2006-07-05	4959.930176	4963.439941	4902.569824	4921.299805	4921.299805	101208700
2006-07-06	4935.279785	4971.689941	4933.189941	4966.450195	4966.450195	114194500
2006-07-07	4950.709961	4977.680176	4921.569824	4953.709961	4953.709961	94507600
2006-07-10	4939.200195	4989.290039	4908.979980	4982.479980	4982.479980	83373600
2006-07-11	4954.149902	4975.779785	4903.279785	4914.390137	4914.390137	150050600
2006-07-12	4946.120117	4978.729980	4932.700195	4941.729980	4941.729980	110991000
2006-07-13	4903.580078	4904.009766	4834.810059	4852.520020	4852.520020	144990300
2006-07-14	4811.799805	4842.850098	4780.790039	4780.790039	4780.790039	92409200
2006-07-17	4790.919922	4790.919922	4710.609863	4750.080078	4750.080078	115001000
2006-07-18	4740.009766	4763.830078	4715.620117	4734.540039	4734.540039	108713400
2006-07-19	4733.270020	4846.540039	4733.270020	4846.540039	4846.540039	129790900
2006-07-20	4870.270020	4895.100098	4854.580078	4865.040039	4865.040039	104987200
2006-07-21	4841.279785	4860.490234	4802.589844	4818.549805	4818.549805	104798000
2006-07-24	4827.069824	4919.439941	4826.169922	4914.930176	4914.930176	87998600
2006-07-25	4931.939941	4958.049805	4915.899902	4933.120117	4933.120117	99402000
2006-07-26	4937.069824	4954.799805	4925.470215	4943.000000	4943.000000	105539600
2006-07-27	4974.419922	5001.209961	4961.540039	5001.209961	5001.209961	162148200
2006-07-28	4978.069824	5030.779785	4962.540039	5028.509766	5028.509766	112566100
2006-07-31	5024.509766	5034.060059	5006.279785	5009.419922	5009.419922	75857600
2006-08-01	5010.950195	5024.089844	4932.410156	4948.229980	4948.229980	97199400
2006-08-02	4984.109863	5027.200195	4976.509766	5026.250000	5026.250000	107618900
2006-08-03	5034.459961	5038.680176	4958.180176	4983.680176	4983.680176	116772200
2006-08-04	5013.430176	5060.470215	4995.770020	5040.950195	5040.950195	110079200
2006-08-07	4980.439941	4995.500000	4950.180176	4956.339844	4956.339844	83503800
2006-08-08	4986.910156	4991.490234	4943.569824	4967.950195	4967.950195	80601600
2006-08-09	4982.839844	5033.189941	4948.180176	5025.149902	5025.149902	100289100
2006-08-10	4973.729980	4986.600098	4935.959961	4976.640137	4976.640137	100626500
2006-08-11	4993.129883	5015.009766	4962.620117	4985.520020	4985.520020	79776400
2006-08-14	5019.169922	5050.399902	5015.479980	5046.930176	5046.930176	65948600
2006-08-15	5033.200195	5125.620117	5031.220215	5115.020020	5115.020020	89813200
2006-08-16	5117.220215	5140.729980	5102.229980	5137.310059	5137.310059	114886000
2006-08-17	5139.779785	5144.839844	5122.399902	5144.839844	5144.839844	101353200
2006-08-18	5142.669922	5157.600098	5127.439941	5135.689941	5135.689941	109359300
2006-08-21	5126.740234	5136.220215	5094.729980	5104.649902	5104.649902	66132800
2006-08-22	5126.189941	5131.180176	5072.729980	5128.330078	5128.330078	84813600
2006-08-23	5126.549805	5131.509766	5075.439941	5082.729980	5082.729980	73152800
2006-08-24	5085.439941	5128.959961	5062.939941	5112.850098	5112.850098	81129600
2006-08-25	5118.410156	5133.779785	5089.450195	5111.129883	5111.129883	60195000
2006-08-28	5104.379883	5154.270020	5083.009766	5148.520020	5148.520020	49177800
2006-08-29	5151.680176	5183.470215	5144.479980	5160.319824	5160.319824	86611200
2006-08-30	5176.970215	5196.910156	5162.709961	5182.790039	5182.790039	96444800
2006-08-31	5196.080078	5196.899902	5157.560059	5165.040039	5165.040039	101008000
2006-09-01	5181.979980	5206.229980	5170.009766	5183.450195	5183.450195	96221800
2006-09-04	5195.180176	5209.060059	5190.379883	5203.240234	5203.240234	73468400
2006-09-05	5201.959961	5202.439941	5147.330078	5172.850098	5172.850098	86220000
2006-09-06	5173.359863	5179.879883	5107.950195	5115.520020	5115.520020	113062500
2006-09-07	5090.240234	5090.270020	5043.759766	5060.089844	5060.089844	115739300
2006-09-08	5072.750000	5091.319824	5058.069824	5073.569824	5073.569824	88738600
2006-09-11	5042.879883	5058.310059	5018.180176	5058.310059	5058.310059	111996600
2006-09-12	5062.939941	5129.359863	5037.729980	5125.970215	5125.970215	133715300
2006-09-13	5142.979980	5152.890137	5113.220215	5137.930176	5137.930176	103605100
2006-09-14	5149.089844	5165.390137	5106.250000	5123.850098	5123.850098	106001900
2006-09-15	5131.020020	5163.060059	5112.879883	5144.879883	5144.879883	219081000
2006-09-18	5152.899902	5159.459961	5119.359863	5146.959961	5146.959961	85135800
2006-09-19	5148.680176	5151.779785	5091.939941	5115.990234	5115.990234	108300900
2006-09-20	5110.609863	5199.109863	5106.009766	5192.740234	5192.740234	125862600
2006-09-21	5190.279785	5222.830078	5175.180176	5208.319824	5208.319824	132922500
2006-09-22	5169.509766	5182.729980	5122.770020	5141.950195	5141.950195	97423200
2006-09-25	5156.439941	5183.890137	5126.390137	5146.490234	5146.490234	114342200
2006-09-26	5184.830078	5229.140137	5176.649902	5219.589844	5219.589844	126516800
2006-09-27	5240.979980	5252.750000	5208.890137	5243.100098	5243.100098	126340900
2006-09-28	5237.580078	5263.439941	5232.779785	5250.009766	5250.009766	123162900
2006-09-29	5258.839844	5285.339844	5246.979980	5250.009766	5250.009766	92262000
2006-10-02	5268.629883	5276.229980	5229.220215	5243.129883	5243.129883	90264000
2006-10-03	5223.750000	5230.509766	5196.069824	5219.790039	5219.790039	98904000
2006-10-04	5219.250000	5261.240234	5216.359863	5256.549805	5256.549805	135673700
2006-10-05	5298.060059	5300.180176	5278.040039	5288.529785	5288.529785	120151100
2006-10-06	5295.000000	5295.000000	5259.220215	5282.060059	5282.060059	116115700
2006-10-09	5261.870117	5291.319824	5261.770020	5284.740234	5284.740234	87269600
2006-10-10	5297.040039	5313.819824	5285.359863	5309.790039	5309.790039	110476600
2006-10-11	5297.879883	5313.720215	5271.560059	5313.189941	5313.189941	114165200
2006-10-12	5317.250000	5363.870117	5310.419922	5361.509766	5361.509766	143355800
2006-10-13	5368.799805	5372.810059	5344.689941	5353.229980	5353.229980	106051900
2006-10-16	5359.000000	5366.259766	5341.629883	5361.970215	5361.970215	88648000
2006-10-17	5347.890137	5353.669922	5298.879883	5302.990234	5302.990234	119019400
2006-10-18	5328.240234	5381.899902	5324.250000	5361.290039	5361.290039	113033100
2006-10-19	5337.600098	5377.740234	5329.680176	5359.740234	5359.740234	99477000
2006-10-20	5373.200195	5399.830078	5359.799805	5375.350098	5375.350098	108537300
2006-10-23	5391.779785	5420.229980	5361.379883	5411.810059	5411.810059	81489800
2006-10-24	5407.790039	5411.370117	5388.140137	5404.540039	5404.540039	160770400
2006-10-25	5398.169922	5427.100098	5395.720215	5422.279785	5422.279785	130502700
2006-10-26	5447.779785	5458.209961	5421.790039	5433.790039	5433.790039	155963000
2006-10-27	5436.620117	5448.669922	5373.259766	5396.029785	5396.029785	121396000
2006-10-30	5352.870117	5365.890137	5341.770020	5362.229980	5362.229980	93173800
2006-10-31	5349.950195	5372.350098	5337.109863	5348.729980	5348.729980	123345100
2006-11-01	5351.359863	5387.770020	5340.060059	5370.859863	5370.859863	73634800
2006-11-02	5345.660156	5354.919922	5290.270020	5310.069824	5310.069824	108283300
2006-11-03	5325.049805	5359.740234	5305.720215	5336.299805	5336.299805	104616600
2006-11-06	5351.459961	5402.359863	5347.399902	5402.359863	5402.359863	99891200
2006-11-07	5407.160156	5447.020020	5400.720215	5437.779785	5437.779785	129042500
2006-11-08	5411.049805	5441.910156	5403.379883	5437.160156	5437.160156	108489600
2006-11-09	5443.729980	5451.350098	5426.250000	5448.600098	5448.600098	120776400
2006-11-10	5430.959961	5454.600098	5418.979980	5447.500000	5447.500000	95019400
2006-11-13	5445.470215	5502.470215	5444.009766	5490.560059	5490.560059	94417000
2006-11-14	5498.799805	5500.720215	5459.890137	5476.279785	5476.279785	106625800
2006-11-15	5504.379883	5511.529785	5486.240234	5511.529785	5511.529785	96072400
2006-11-16	5500.680176	5518.430176	5490.870117	5505.720215	5505.720215	110751300
2006-11-17	5479.959961	5489.120117	5422.009766	5439.709961	5439.709961	129928000
2006-11-20	5414.310059	5466.830078	5394.049805	5454.740234	5454.740234	87725200
2006-11-21	5451.979980	5486.209961	5449.899902	5459.350098	5459.350098	89983600
2006-11-22	5481.209961	5494.339844	5439.250000	5452.490234	5452.490234	124419500
2006-11-23	5465.729980	5470.750000	5399.810059	5424.859863	5424.859863	81019200
2006-11-24	5407.229980	5416.359863	5349.669922	5389.459961	5389.459961	106445000
2006-11-27	5377.250000	5402.089844	5308.649902	5308.649902	5308.649902	115500800
2006-11-28	5304.500000	5321.109863	5272.470215	5306.240234	5306.240234	122292500
2006-11-29	5336.390137	5381.250000	5317.419922	5381.250000	5381.250000	120934900
2006-11-30	5388.379883	5398.959961	5325.259766	5327.640137	5327.640137	161144300
2006-12-01	5341.620117	5365.299805	5239.839844	5254.049805	5254.049805	253275000
2006-12-04	5268.240234	5299.120117	5246.379883	5296.080078	5296.080078	121021300
2006-12-05	5311.879883	5374.109863	5298.930176	5359.689941	5359.689941	149481000
2006-12-06	5362.640137	5376.149902	5325.049805	5350.620117	5350.620117	116672900
2006-12-07	5331.430176	5401.490234	5330.979980	5379.209961	5379.209961	139419300
2006-12-08	5354.759766	5387.700195	5329.490234	5384.160156	5384.160156	119560300
2006-12-11	5413.129883	5432.350098	5401.379883	5427.560059	5427.560059	130505100
2006-12-12	5429.359863	5432.569824	5406.549805	5426.819824	5426.819824	126213900
2006-12-13	5428.490234	5480.399902	5421.839844	5475.850098	5475.850098	149098700
2006-12-14	5496.129883	5516.500000	5490.310059	5509.580078	5509.580078	125106700
2006-12-15	5525.379883	5553.450195	5513.629883	5541.620117	5541.620117	194906000
2006-12-18	5533.080078	5545.000000	5526.830078	5530.319824	5530.319824	107545900
2006-12-19	5498.479980	5507.750000	5464.870117	5484.759766	5484.759766	112640000
2006-12-20	5512.310059	5524.979980	5507.870117	5514.419922	5514.419922	100254600
2006-12-21	5499.430176	5527.109863	5496.959961	5510.390137	5510.390137	98855400
2006-12-22	5496.540039	5503.200195	5453.109863	5453.939941	5453.939941	68259600
2006-12-27	5482.680176	5540.009766	5478.850098	5540.009766	5540.009766	55541200
2006-12-28	5546.740234	5549.470215	5520.770020	5533.359863	5533.359863	51716200
2006-12-29	5531.629883	5553.859863	5531.629883	5541.759766	5541.759766	50608800
2007-01-02	5575.759766	5621.649902	5575.629883	5617.709961	5617.709961	85910000
2007-01-03	5621.000000	5623.669922	5596.819824	5610.919922	5610.919922	118580700
2007-01-04	5573.729980	5585.540039	5547.169922	5574.560059	5574.560059	130465700
2007-01-05	5552.640137	5566.240234	5517.350098	5517.350098	5517.350098	126420500
2007-01-08	5532.569824	5555.669922	5509.060059	5518.589844	5518.589844	115053800
2007-01-09	5549.009766	5563.479980	5532.620117	5533.029785	5533.029785	151688200
2007-01-10	5505.359863	5524.109863	5473.470215	5501.950195	5501.950195	134474700
2007-01-11	5523.720215	5609.799805	5515.600098	5609.799805	5609.799805	157830500
2007-01-12	5597.020020	5619.930176	5589.029785	5617.620117	5617.620117	129982000
2007-01-15	5641.370117	5649.759766	5623.350098	5631.080078	5631.080078	96391200
2007-01-16	5637.270020	5645.200195	5588.770020	5591.540039	5591.540039	119572400
2007-01-17	5592.310059	5602.680176	5538.479980	5561.779785	5561.779785	117555700
2007-01-18	5584.750000	5609.339844	5539.819824	5555.040039	5555.040039	153034400
2007-01-19	5554.500000	5623.399902	5529.439941	5614.700195	5614.700195	161119200
2007-01-22	5630.410156	5639.700195	5576.560059	5579.779785	5579.779785	127162700
2007-01-23	5582.990234	5592.819824	5539.759766	5575.069824	5575.069824	240186200
2007-01-24	5595.959961	5646.140137	5593.359863	5638.080078	5638.080078	149718200
2007-01-25	5649.009766	5658.080078	5590.649902	5609.200195	5609.200195	131019000
2007-01-26	5577.310059	5611.839844	5547.680176	5582.299805	5582.299805	136073800
2007-01-29	5592.729980	5630.330078	5582.430176	5619.700195	5619.700195	105438200
2007-01-30	5610.890137	5653.879883	5603.229980	5645.589844	5645.589844	104085700
2007-01-31	5637.770020	5653.759766	5601.169922	5608.310059	5608.310059	116580400
2007-02-01	5664.089844	5689.439941	5657.229980	5662.250000	5662.250000	132583400
2007-02-02	5680.129883	5693.470215	5666.770020	5677.299805	5677.299805	119787900
2007-02-05	5671.229980	5691.830078	5659.359863	5681.109863	5681.109863	103841700
2007-02-06	5680.120117	5699.270020	5670.479980	5676.779785	5676.779785	100431900
2007-02-07	5687.270020	5710.569824	5681.890137	5703.000000	5703.000000	122518400
2007-02-08	5705.160156	5711.040039	5652.479980	5665.100098	5665.100098	119012600
2007-02-09	5699.180176	5710.310059	5688.939941	5692.450195	5692.450195	123393300
2007-02-12	5670.729980	5670.729980	5625.169922	5643.950195	5643.950195	102407200
2007-02-13	5656.479980	5682.689941	5651.270020	5682.689941	5682.689941	115131700
2007-02-14	5700.399902	5725.839844	5693.359863	5725.839844	5725.839844	125880400
2007-02-15	5724.540039	5729.160156	5703.669922	5720.879883	5720.879883	140234300
2007-02-16	5716.430176	5728.359863	5703.640137	5713.589844	5713.589844	109439300
2007-02-19	5723.049805	5758.330078	5717.370117	5739.899902	5739.899902	84568200
2007-02-20	5739.270020	5744.779785	5678.379883	5713.450195	5713.450195	101759500
2007-02-21	5732.799805	5736.240234	5677.589844	5694.560059	5694.560059	110464500
2007-02-22	5723.149902	5737.359863	5700.779785	5707.859863	5707.859863	113583300
2007-02-23	5723.790039	5727.600098	5688.830078	5716.379883	5716.379883	134365000
2007-02-26	5732.279785	5771.689941	5728.069824	5762.540039	5762.540039	104397000
2007-02-27	5719.040039	5719.450195	5581.060059	5588.390137	5588.390137	208229600
2007-02-28	5475.890137	5556.850098	5458.649902	5516.319824	5516.319824	248669100
2007-03-01	5502.089844	5555.370117	5355.750000	5458.399902	5458.399902	285963100
2007-03-02	5480.270020	5499.220215	5391.100098	5424.700195	5424.700195	182954000
[truncated: 3,147 more rows]
